# Supplementary material for: AIE-active metal–organic frameworks: facile preparation, tunable light emission, ultrasensitive sensing of copper(ii) and visual fluorescence detection of glucose
Source: Royal Society of Chemistry journal article supplement (doi:10.1039/d0tc00106f), 2020-01-01
Supplement: d0tc00106f1.pdf [file d0tc00106f1.pdf]

## Supporting Information for

### **AIE-active metal-organic frameworks: facile preparation, tunable light emission, ultrasensitive sensing of copper (II) and visual fluorescence detection of glucose**

Siqi Xie<sup>1</sup>, Qi Liu<sup>\*1</sup>, Fawei Zhu<sup>1</sup>, Miao Chen<sup>1,2</sup>, Lumin Wang<sup>1</sup>, Yu Xiong<sup>3</sup>, Yuqiu Zhu<sup>1</sup>, Yu Zheng<sup>1</sup>, Xiaoqing Chen<sup>\*1</sup>

<sup>1</sup>*College of Chemistry and Chemical Engineering, Key Laboratory of Hunan Province for Water Environment and Agriculture Product Safety, Central South University, Changsha 410083, Hunan, China.*

<sup>2</sup>*School of Life Sciences, Central South University, Changsha 410083, Hunan, China.*

<sup>3</sup>*Department of Chemistry, Tsinghua University, Beijing 100084, China*

E-mail address: iliuqi@csu.edu.cn (Qi Liu), xqchen@csu.edu.cn (Xiaoqing Chen)

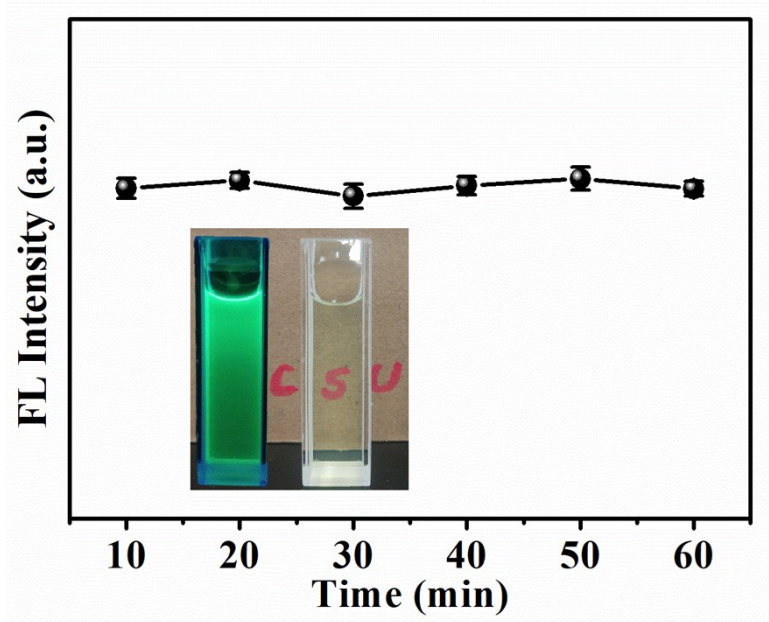

**Figure S1** AIE-active MOFs solution was placed under the UV lamp of 365 nm for continuous irradiation for one hour in the static conditions, and the fluorescence intensity was measured every 10 mins at the excitation wavelength of 365 nm, indicating the resulted LOMF possesses good

dispersibility. Insert view: LMOF-2 solution under 365 nm UV lamp (right), and high transprence of LMOF-2 solution (left), the background is a cardboard.

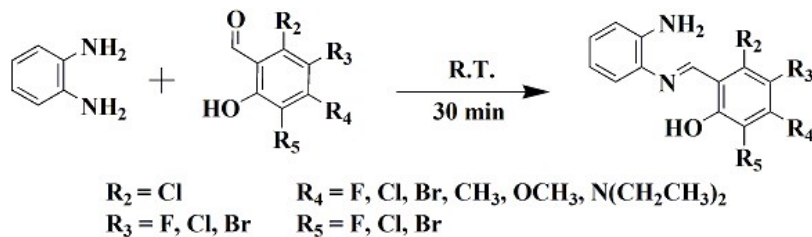

**Figure S2** Synthetic routes of APMP and its derivatives.

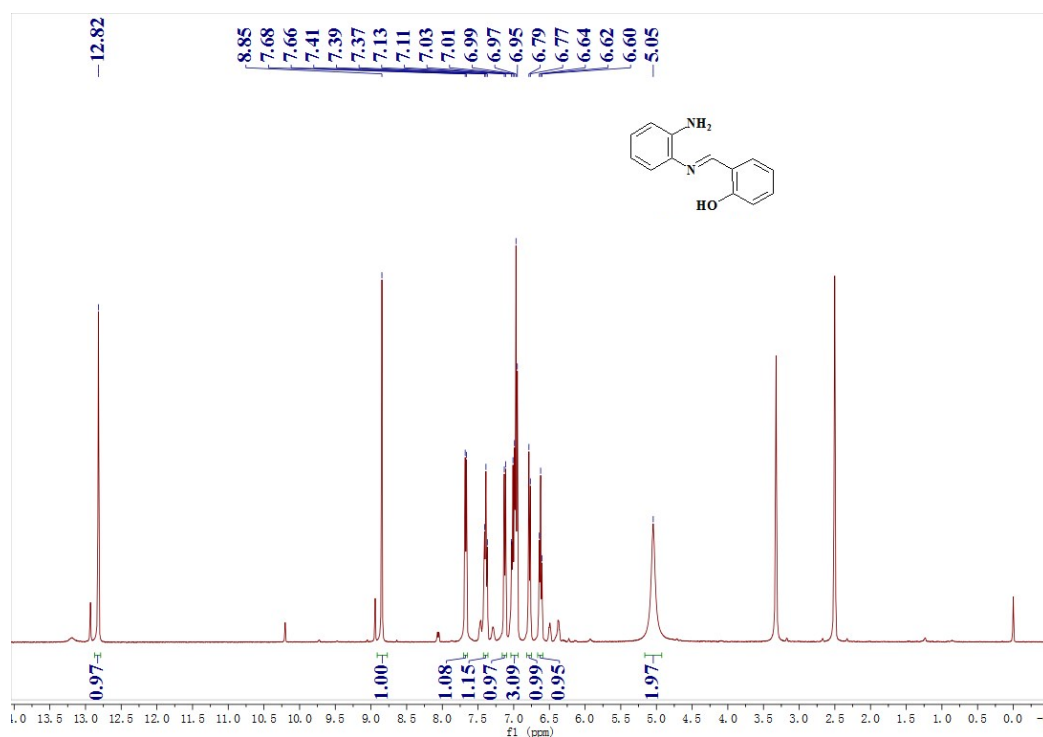

**Figure S3**  $^1\text{H}$  NMR spectrum of APMP in  $\text{DMSO}-d_6$ .

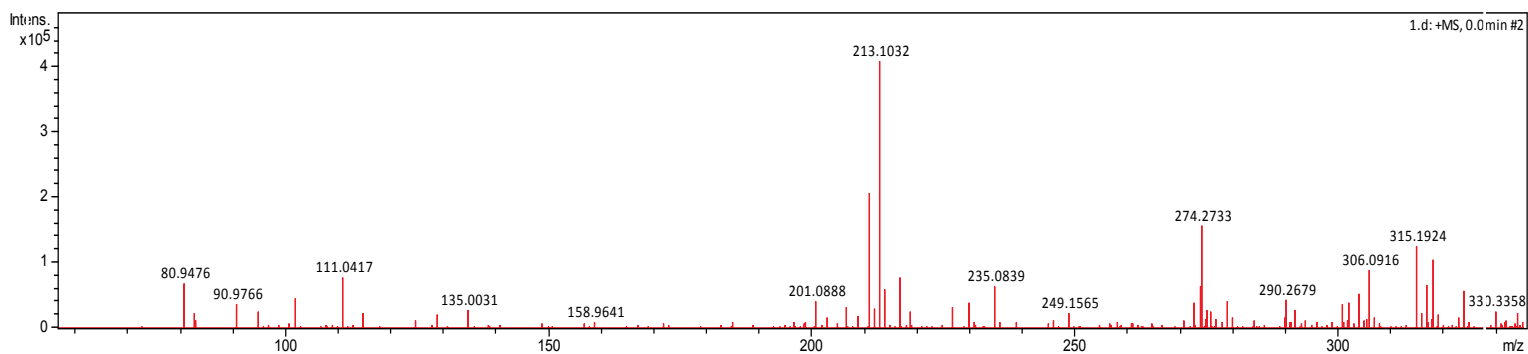

**Figure S4** High-resolution mass spectra (HRMS) of APMP.

Characterization date of APMP, yellow solid, 82% yield,  $^1\text{H}$  NMR ( $\text{DMSO}-d_6$ , 400 MHz)  $\delta$  12.82 (s, 1H), 8.85 (s, 1H), 7.67 (d,  $J = 7.2$  Hz, 1H), 7.39 (t,  $J = 7.6$  Hz, 1H), 7.12 (d,  $J = 7.6$  Hz, 1H), 7.03-6.95 (m, 3H), 6.78 (d,  $J = 7.2$  Hz, 1H), 6.23 (t,  $J = 7.6$  Hz, 1H), 5.05 (s, 1H);

HRMSEI(+) calcd for  $C_{13}H_{13}N_2O^+ [M+1]^+$  213.1022, found 213.1032;

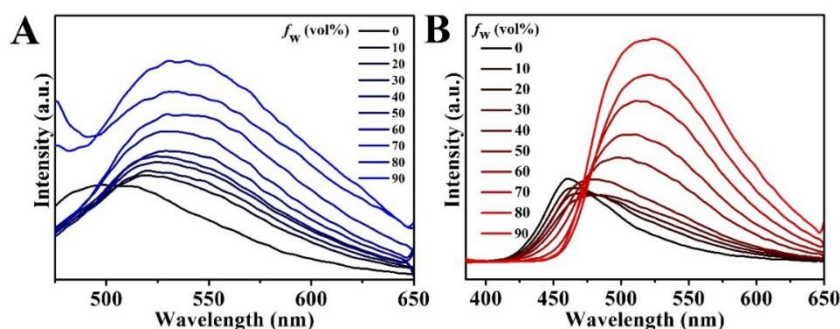

**Figure S5** The typical AIE phenomenon of APMP (A) and APMP-2 (B).

## 1. Thermal gravimetric analysis (TGA)

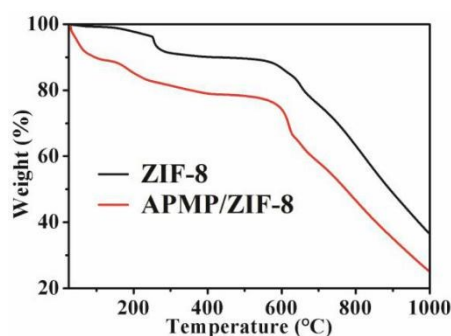

**Figure S6** TGA of ZIF-8 and APMP/ZIF-8.

The first-stage decomposition of the APMP/ZIF-8 composite started from 30°C and plateaued around 500°C with about 20% weight loss due to the remove of residual solvent and the decomposition of APMP, which is slightly higher than that the pure ZIF-8 crystal (400°C) resulted from the presence of APMP conjugated on the surface of ZIF-8. After 500°C, the weight loss can be attributed to the decomposition of framework. During 500-700°C, only about 20% weight loss reflects the good thermal stability of ZIF-8 and APMP/ZIF-8. And the functionalization ratio of APMP on the APMP/ZIF-8 was calculated to be about 12.66 %.

## 2. $^1H$ , $^{13}C$ NMR spectra and HRMS of APMP derivatives

Characterization data of APMP-1: yellow solid, 63% yield,  $^1H$  NMR (DMSO- $d_6$ , 400 MHz)  $\delta$  13.46 (s, 1H), 8.85 (s, 1H), 7.74 (t,  $J = 7.6$  Hz, 1H), 7.12 (d,  $J = 0.8$  Hz, 1H), 7.03-6.99 (m, 1H), 6.84-6.77 (m, 3H), 6.64-6.60 (m, 1H), 5.06 (s, 2H);  $^{13}C$  NMR (DMSO- $d_6$ , 100 MHz, )  $\delta$  165.11, 163.41, 162.62, 160.46, 143.05, 134.60, 134.34, 128.28, 118.89, 117.62, 117.17, 115.85, 107.06, 103.85; HRMSEI(+) calcd for  $C_{13}H_{12}FN_2O^+ [M+1]^+$  231.0928, found 231.0926;

Characterization data of APMP-2 yellow solid, 83% yield,  $^1H$  NMR (DMSO- $d_6$ , 400 MHz)  $\delta$

13.18 (s, 1H), 8.86 (s, 1H), 7.72 (d,  $J = 7.6$  Hz, 1H), 7.13 (d,  $J = 8.0$  Hz, 1H), 7.04-7.00 (m, 3H), 6.78 (d,  $J = 8.0$  Hz, 1H), 6.62 (t,  $J = 7.2$  Hz, 1H), 5.10 (s, 2H);  $^{13}\text{C}$  NMR (DMSO- $d_6$ , 100 MHz)  $\delta$  161.2, 159.7, 143.3, 137.2, 134.3, 133.458, 128.48, 119.74, 119.63, 118.78, 117.14, 116.76, 115.89; HRMSEI(+) calcd for  $\text{C}_{13}\text{H}_{12}\text{ClN}_2\text{O}^+$   $[\text{M}+1]^+$  247.0633, found 247.0631;

Characterization date of APMP-3: yellow solid, 88% yield,  $^1\text{H}$  NMR (DMSO- $d_6$ , 400 MHz)  $\delta$  13.12 (s, 1H), 8.85 (s, 1H), 7.65 (d,  $J = 8.0$  Hz, 1H), 7.19-7.12 (m, 3H), 7.04-7.00 (m, 1H), 6.78 (dd,  $J = 8.0, 1.2$  Hz, 1H), 6.64-6.60 (m, 1H), 5.10 (s, 2H);  $^{13}\text{C}$  NMR (DMSO- $d_6$ , 100 MHz)  $\delta$  161.06, 159.77, 143.3, 134.33, 133.64, 128.50, 126.05, 122.61, 119.94, 119.72, 118.75, 117.17, 115.92; HRMSEI(+) calcd for  $\text{C}_{13}\text{H}_{12}\text{BrN}_2\text{O}^+$   $[\text{M}+1]^+$  291.0128, found 291.0111;

Characterization date of APMP-4: yellow solid, 90% yield,  $^1\text{H}$  NMR (DMSO- $d_6$ , 400 MHz)  $\delta$  12.78 (s, 1H), 8.88 (s, 1H), 7.48-7.44 (m, 2H), 7.14 (dd,  $J = 8.0, 1.2$  Hz, 1H), 7.06-7.02 (m, 1H), 6.79 (dd,  $J = 8.0, 0.8$  Hz, 1H), 6.64-6.61 (m, 1H), 5.20 (s, 2H);  $^{13}\text{C}$  NMR (DMSO- $d_6$ , 100 MHz)  $\delta$  158.53, 154.01, 150.82, 144.94, 143.65, 133.86, 128.96, 122.38, 118.72, 117.06, 116.03, 112.25, 107.85; HRMSEI(+) calcd for  $\text{C}_{13}\text{H}_{11}\text{F}_2\text{N}_2\text{O}^+$   $[\text{M}+1]^+$  249.0834, found 249.0807;

Characterization date of APMP-5: red solid, 94% yield,  $^1\text{H}$  NMR (DMSO- $d_6$ , 400 MHz)  $\delta$  14.28 (s, 1H), 8.90 (s, 1H), 7.75-7.71 (m, 2H), 7.17 (dd,  $J = 8.0, 0.8$  Hz, 1H), 7.08-7.04 (m, 1H), 6.81 (dd,  $J = 7.6, 0.8$  Hz, 1H), 6.67-6.63 (m, 1H), 5.26 (s, 2H);  $^{13}\text{C}$  NMR (DMSO- $d_6$ , 100 MHz)  $\delta$  159.96, 155.83, 143.42, 132.95, 132.02, 130.64, 129.18, 122.46, 121.91, 121.76, 119.18, 117.24, 116.35; HRMSEI(+) calcd for  $\text{C}_{13}\text{H}_{11}\text{Cl}_2\text{N}_2\text{O}^+$   $[\text{M}+1]^+$  281.0243, found 281.0226;

Characterization date of APMP-6: orange solid, 96% yield,  $^1\text{H}$  NMR (DMSO- $d_6$ , 400 MHz)  $\delta$  14.42 (s, 1H), 8.87 (s, 1H), 7.90-7.89 (m, 2H), 7.18 (dd,  $J = 8.0, 0.8$  Hz, 1H), 7.08-7.04 (m, 1H), 6.81 (dd,  $J = 8.0, 0.8$  Hz, 1H), 6.67-6.63 (m, 1H), 5.21 (s, 2H);  $^{13}\text{C}$  NMR (DMSO- $d_6$ , 100 MHz)  $\delta$  159.98, 157.26, 143.41, 137.29, 134.28, 132.82, 129.18, 122.14, 119.25, 117.27, 116.38, 111.77, 109.83; HRMSEI(+) calcd for  $\text{C}_{13}\text{H}_{11}\text{Br}_2\text{N}_2\text{O}^+$   $[\text{M}+1]^+$  368.9233, found 368.9219;

Characterization date of APMP-7: yellow solid, 66% yield,  $^1\text{H}$  NMR (DMSO- $d_6$ , 400 MHz)  $\delta$  12.83 (s, 1H), 8.79 (s, 1H), 7.53 (d,  $J = 8.4$  Hz, 1H), 7.11 (dd,  $J = 7.6, 0.8$  Hz, 1H), 7.02-6.97 (m, 1H), 6.80-6.76 (m, 3H), 6.64-6.60 (m, 1H), 5.02 (s, 2H), 2.32 (s, 3H);  $^{13}\text{C}$  NMR (DMSO- $d_6$ , 100 MHz)  $\delta$  161.19, 160.36, 143.79, 142.99, 134.77, 132.46, 128.04, 120.62, 118.73, 118.05, 117.19, 117.16, 115.74, 21.88; HRMSEI(+) calcd for  $\text{C}_{14}\text{H}_{15}\text{N}_2\text{O}^+$   $[\text{M}+1]^+$  227.1179, found 227.1181;

Characterization date of APMP-8: yellow solid, 76% yield,  $^1\text{H}$  NMR (DMSO- $d_6$ , 400 MHz)  $\delta$

13.36 (s, 1H), 8.75 (s, 1H), 7.55 (d,  $J = 8.4$  Hz, 1H), 7.09 (dd,  $J = 8.0, 1.2$  Hz, 1H), 7.00-6.96 (m, 1H), 6.77 (dd,  $J = 8.0, 1.2$  Hz, 1H), 6.64-6.59 (m, 1H), 6.56 (dd,  $J = 8.5, 1.2$  Hz, 1H), 6.50 (d,  $J = 2.0$  Hz, 1H), 4.98 (s, 2H), 3.81 (s, 3H);  $^{13}\text{C}$  NMR (DMSO- $d_6$ , 100 MHz)  $\delta$  163.68, 162.88, 161.07, 142.74, 134.73, 134.11, 127.73, 118.75, 117.25, 115.71, 114.08, 106.98, 101.24, 56.51, 55.89, 19.02; HRMSEI(+) calcd for  $\text{C}_{14}\text{H}_{15}\text{N}_2\text{O}_2^+$   $[\text{M}+1]^+$  243.1128, found 243.1147;

Characterization data of APMP-9: yellow solid, 73% yield,  $^1\text{H}$  NMR (DMSO- $d_6$ , 400 MHz)  $\delta$  13.29 (s, 1H), 8.56 (s, 1H), 7.33 (d,  $J = 8.8$  Hz, 1H), 7.03 (dd,  $J = 8.0, 1.2$  Hz, 1H), 6.95-6.91 (m, 1H), 6.75 (dd,  $J = 8.0, 1.2$  Hz, 1H), 6.62-6.58 (m, 1H), 6.30 (dd,  $J = 8.4, 2.4$  Hz, 1H), 6.09 (d,  $J = 2.4$  Hz, 1H), 4.86 (s, 2H), 3.39 (q,  $J = 2.8$  Hz, 4H), 1.12 (t,  $J = 6.8$  Hz, 6H);  $^{13}\text{C}$  NMR (DMSO- $d_6$ , 100 MHz)  $\delta$  163.02, 160.68, 151.62, 142.36, 135.42, 134.26, 126.82, 118.36, 117.32, 115.44, 109.53, 97.35, 44.39, 13.02; HRMSEI(+) calcd for  $\text{C}_{17}\text{H}_{22}\text{N}_3\text{O}^+$   $[\text{M}+1]^+$  284.1757, found 284.1767;

Characterization data of APMP-10: yellow solid, 83% yield,  $^1\text{H}$  NMR (DMSO- $d_6$ , 400 MHz)  $\delta$  14.21 (s, 1H), 9.05 (s, 1H), 7.40 (t,  $J = 7.40$ , 1H), 7.16 (dd,  $J = 8.0, 1.2$  Hz, 1H), 7.08-7.04 (m, 2H), 6.97 (d,  $J = 8.4$  Hz, 1H), 6.82 (dd,  $J = 8.0, 0.8$  Hz, 1H), 6.67-6.63 (m, 1H), 5.17 (s, 2H);  $^{13}\text{C}$  NMR (DMSO- $d_6$ , 100 MHz)  $\delta$  162.58, 158.03, 143.18, 135.37, 134.17, 133.93, 128.98, 120.42, 119.28, 117.39, 116.84, 116.55, 116.10; HRMSEI(+) calcd for  $\text{C}_{13}\text{H}_{12}\text{ClN}_2\text{O}^+$   $[\text{M}+1]^+$  247.0633, found 247.0604;

Characterization data of APMP-11: yellow solid, 89% yield,  $^1\text{H}$  NMR (DMSO- $d_6$ , 400 MHz)  $\delta$  12.63 (s, 1H), 8.83 (s, 1H), 7.80 (s, 1H), 7.40 (d,  $J = 8.0$  Hz, 1H), 7.11-6.98 (m, 3H), 6.78 (d,  $J = 7.2$  Hz, 1H), 6.64-6.60 (m, 1H), 5.12 (s, 2H);  $^{13}\text{C}$  NMR (DMSO- $d_6$ , 100 MHz)  $\delta$  158.86, 143.46, 134.44, 132.54, 130.74, 128.58, 123.04, 118.9, 117.1, 115.9; HRMSEI(+) calcd for  $\text{C}_{13}\text{H}_{12}\text{ClN}_2\text{O}^+$   $[\text{M}+1]^+$  247.0633, found 247.0621;

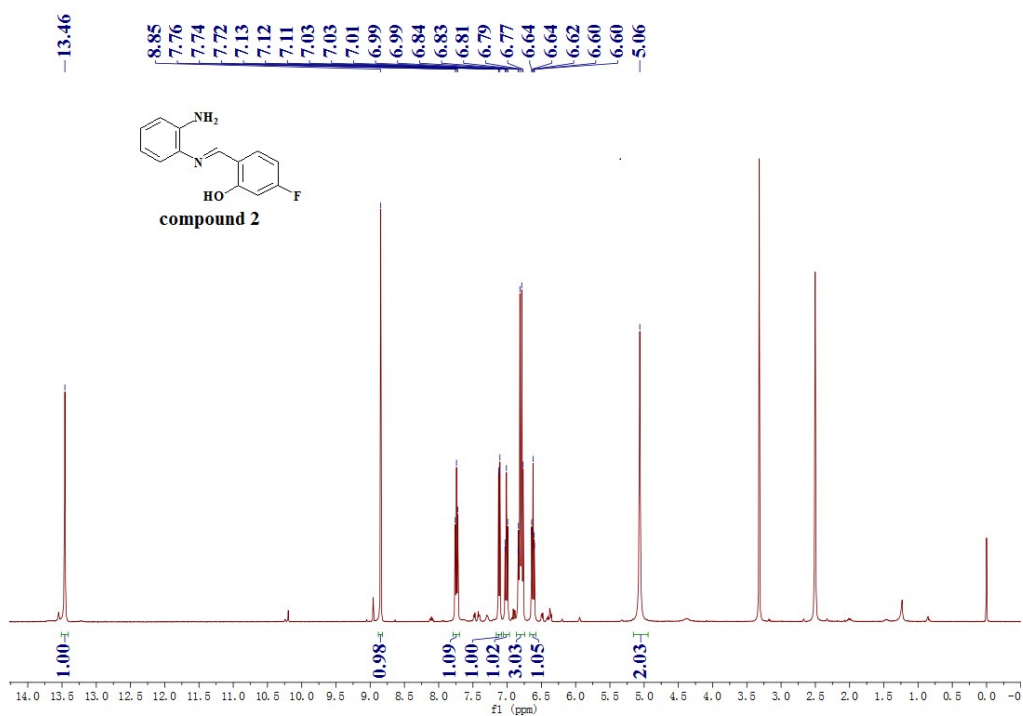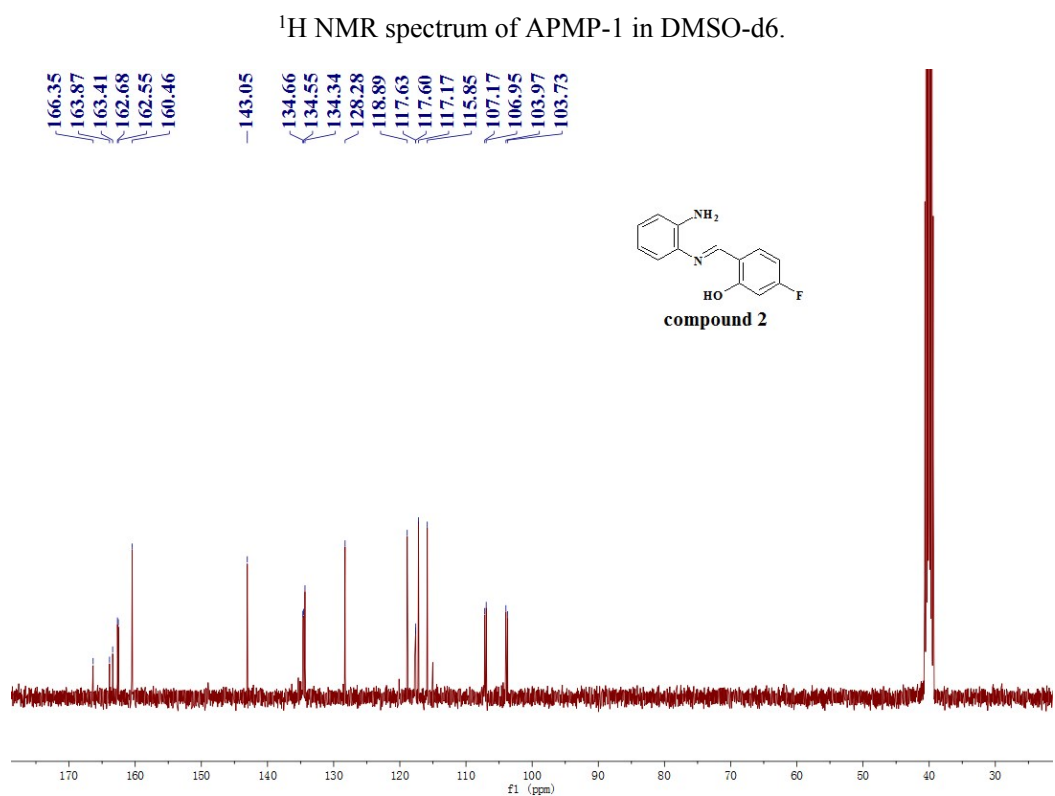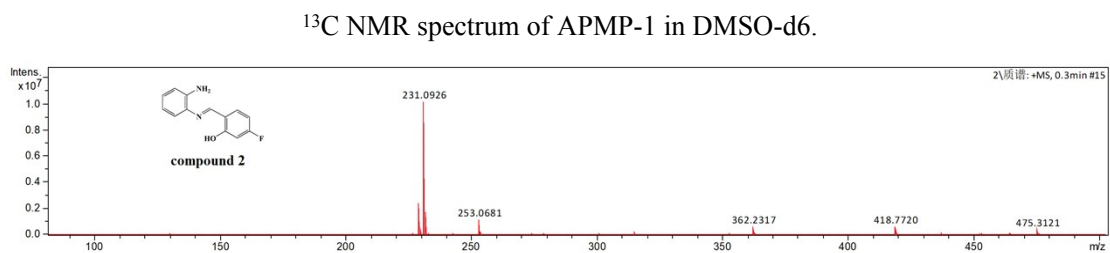

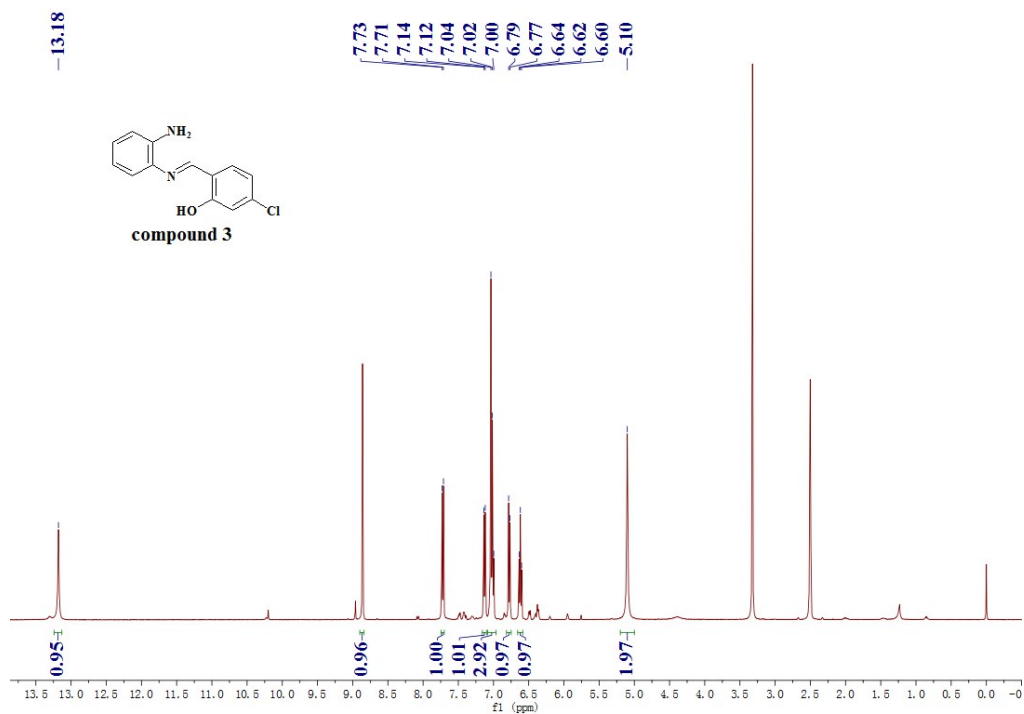

<sup>1</sup>H NMR spectrum of APMP-2 in DMSO-d<sub>6</sub>.

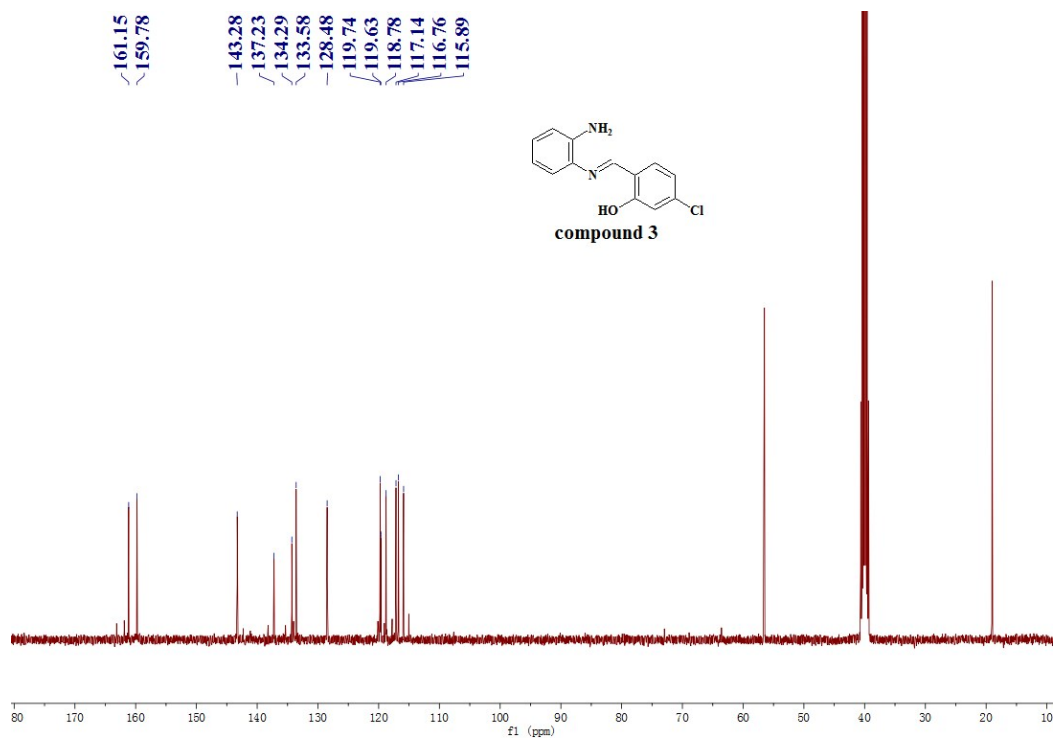

<sup>13</sup>C NMR spectrum of APMP-2 in DMSO-d<sub>6</sub>.

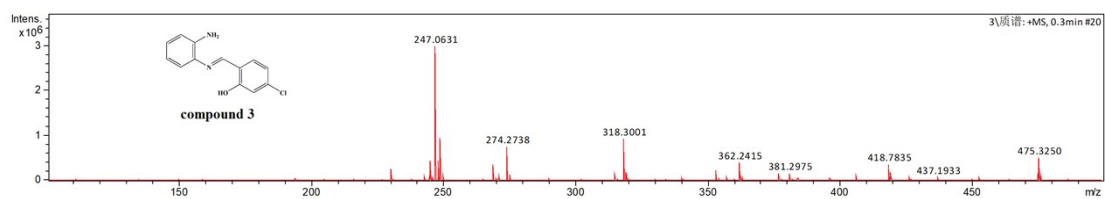

High-resolution mass spectra (HRMS) of APMP-2.

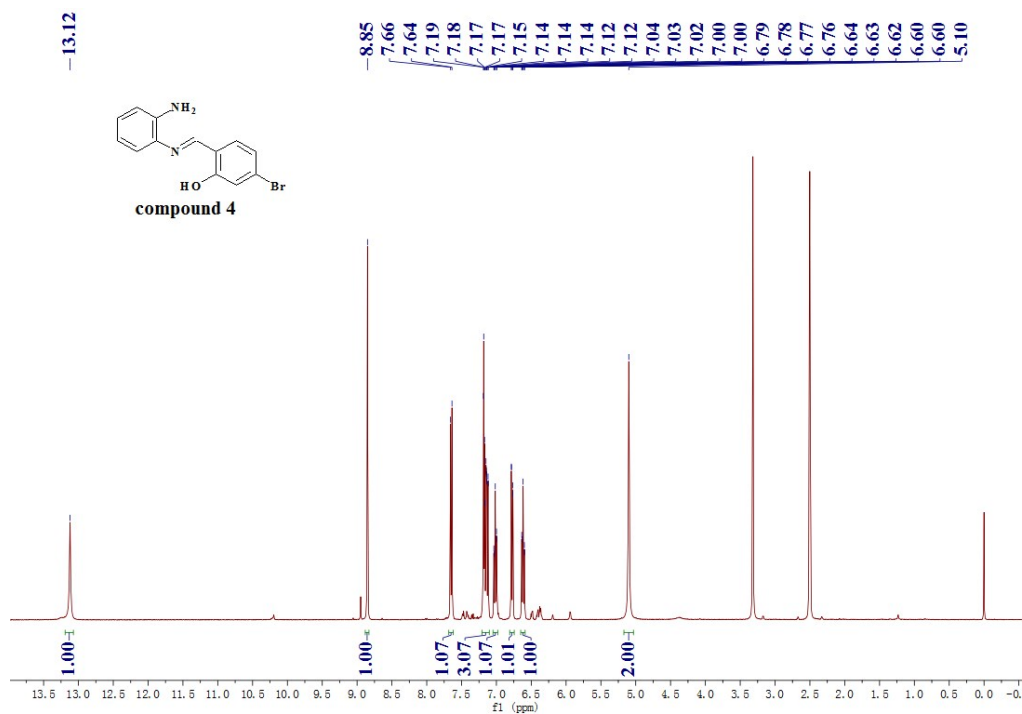

<sup>1</sup>H NMR spectrum of APMP-3 in DMSO-d<sub>6</sub>.

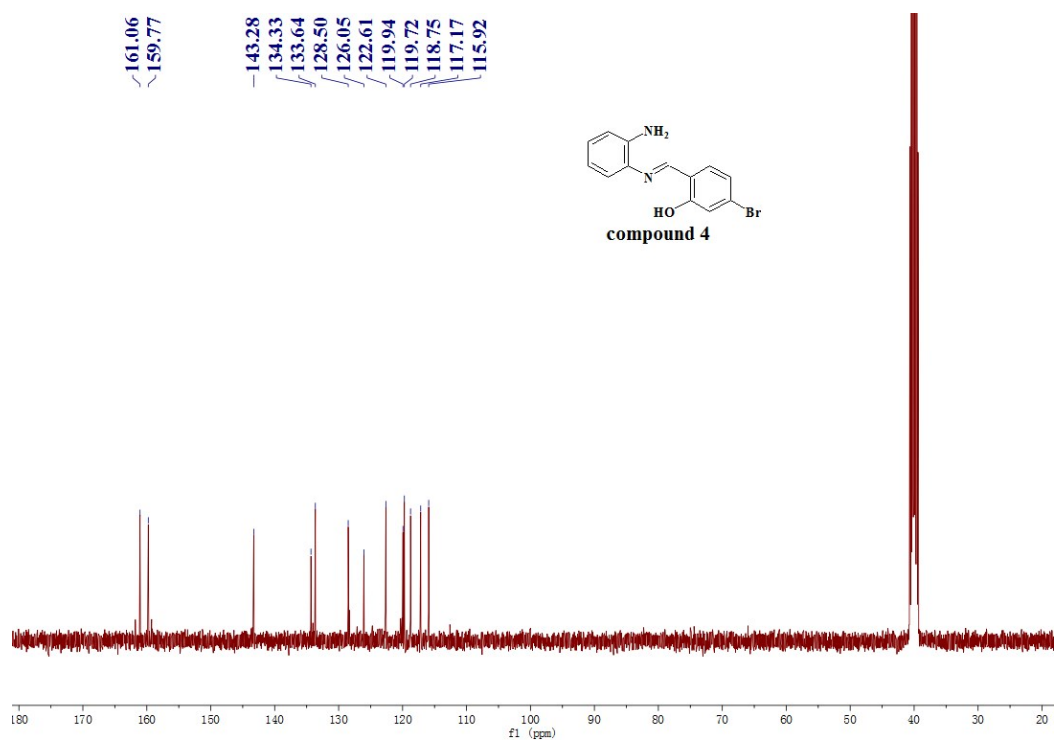

<sup>13</sup>C NMR spectrum of APMP-3 in DMSO-d<sub>6</sub>.

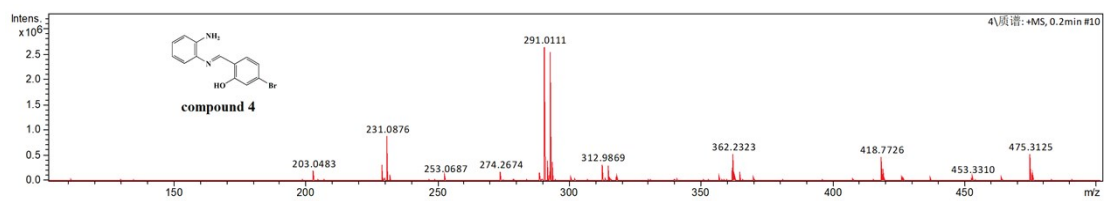

High-resolution mass spectra (HRMS) of APMP-3.



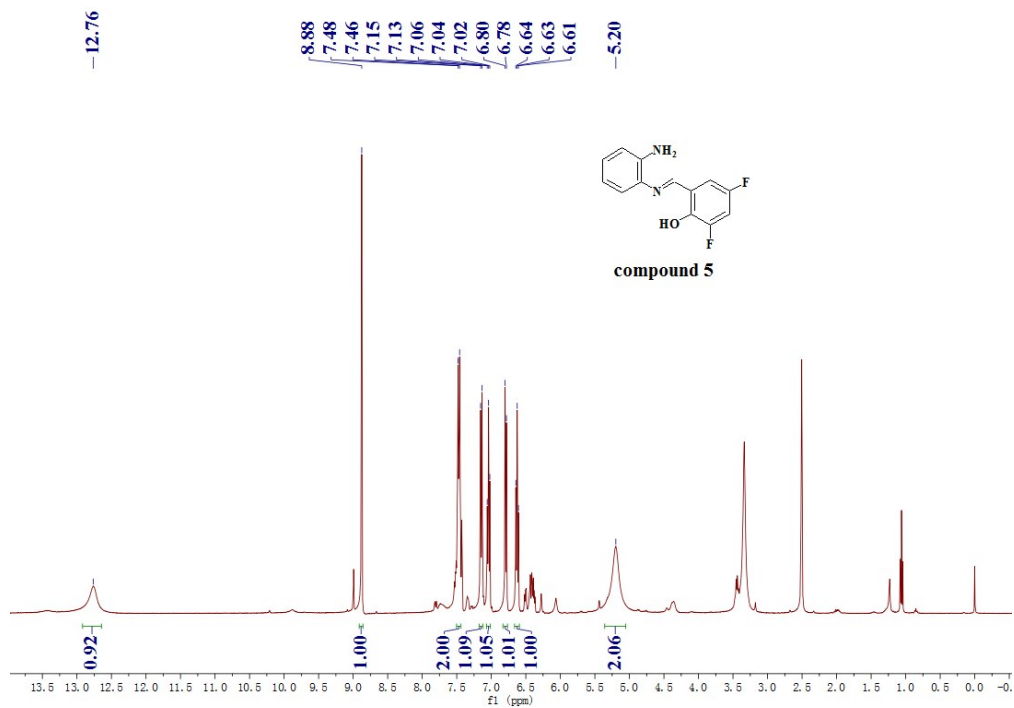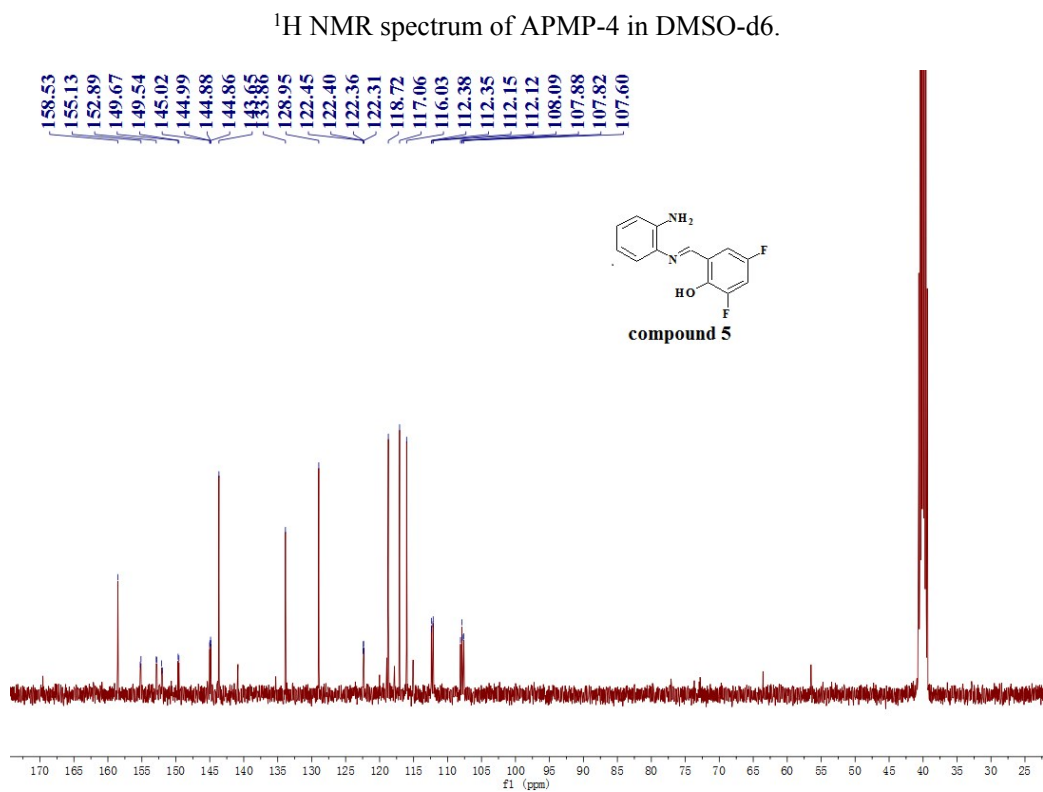

**13C NMR spectrum of APMP-4 in DMSO-d6.**

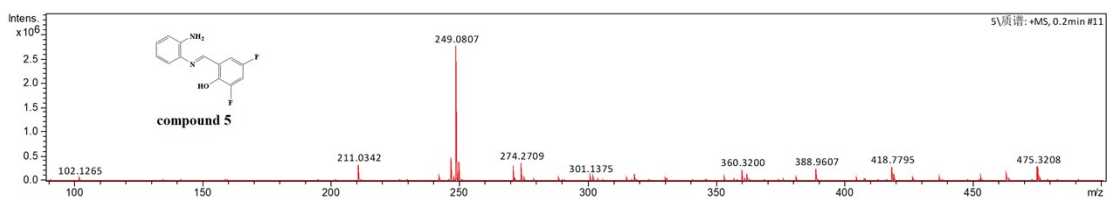

**High-resolution mass spectra (HRMS) of APMP-4.**

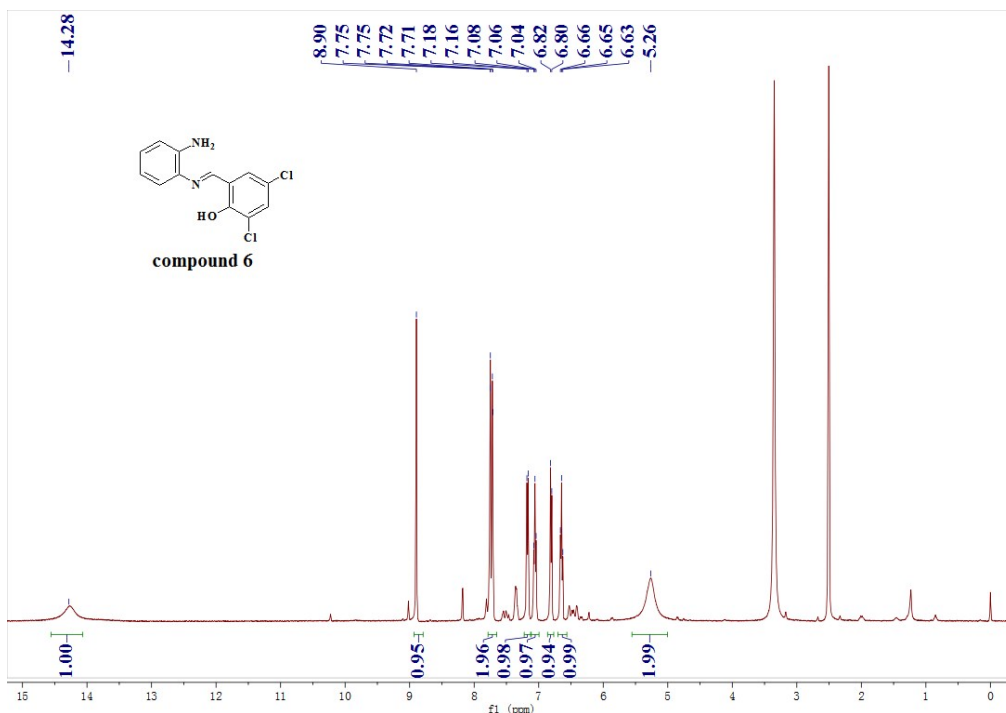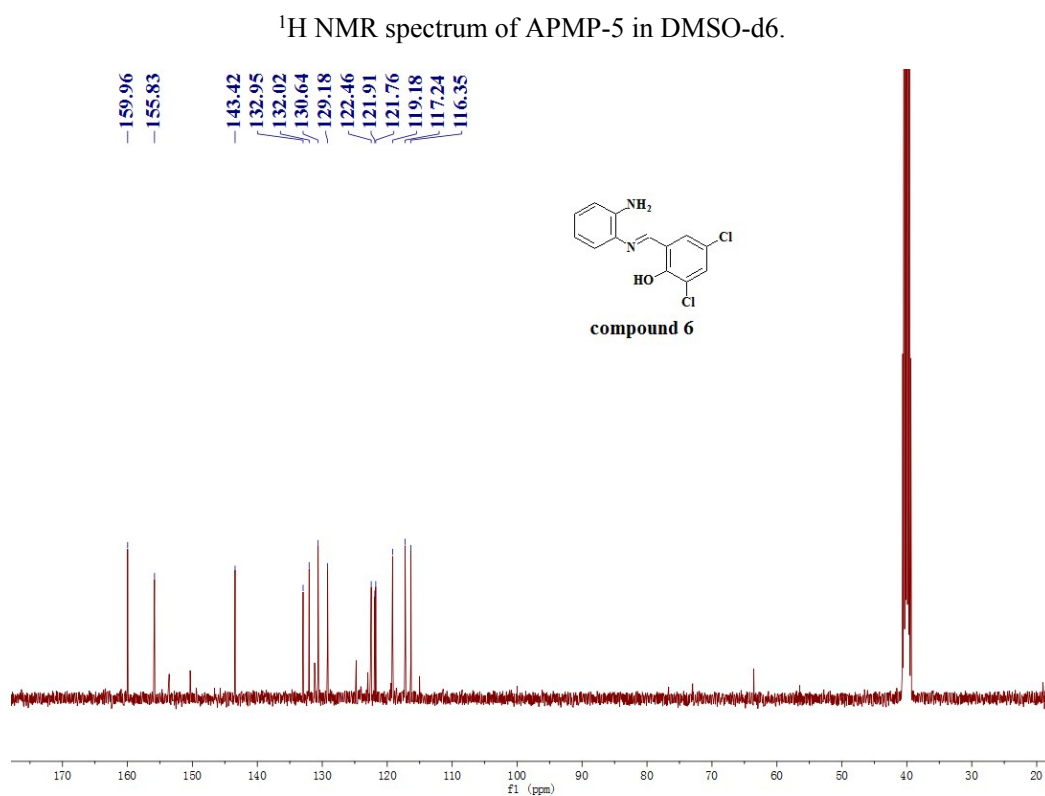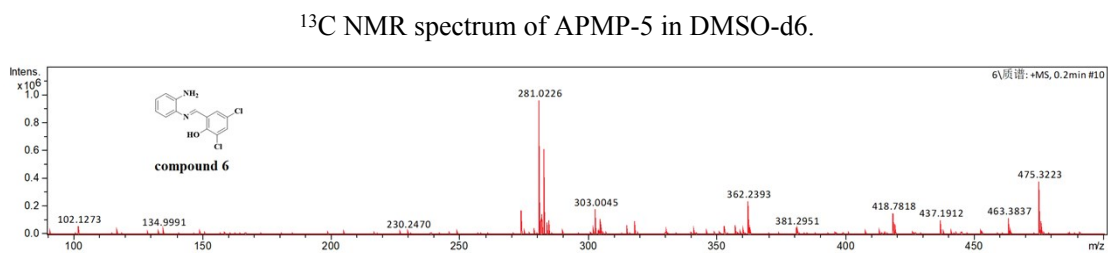

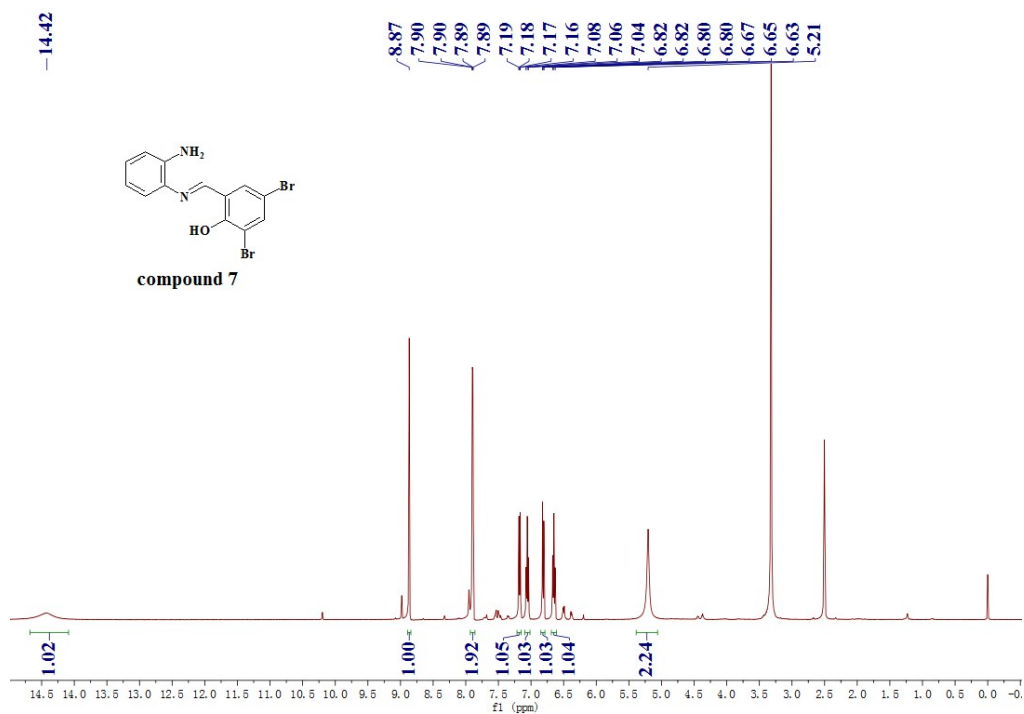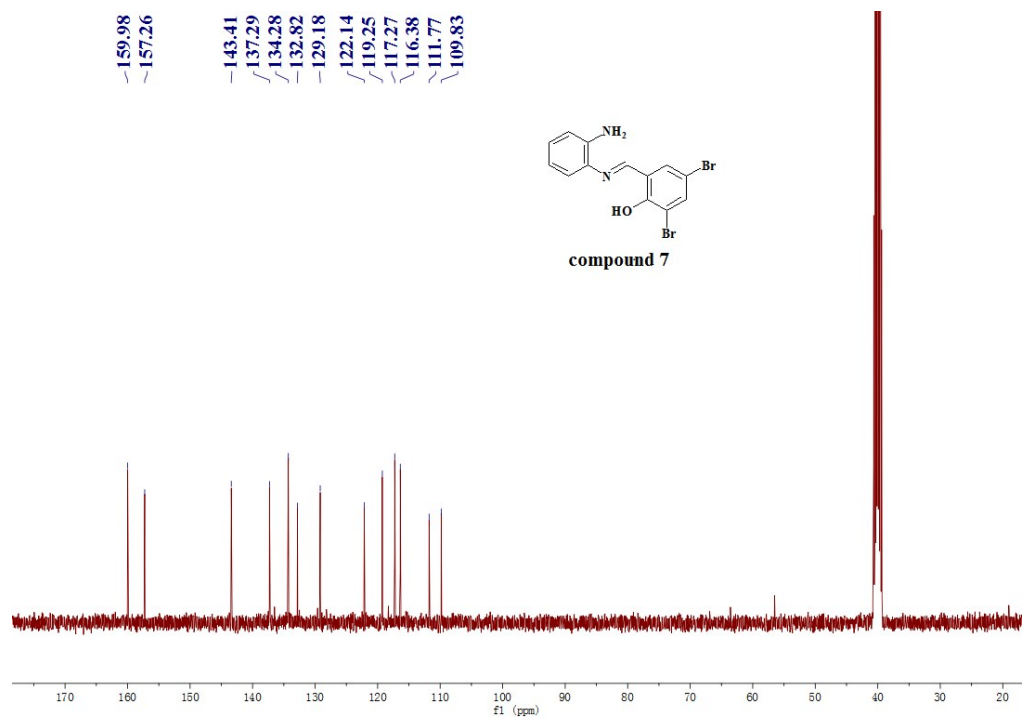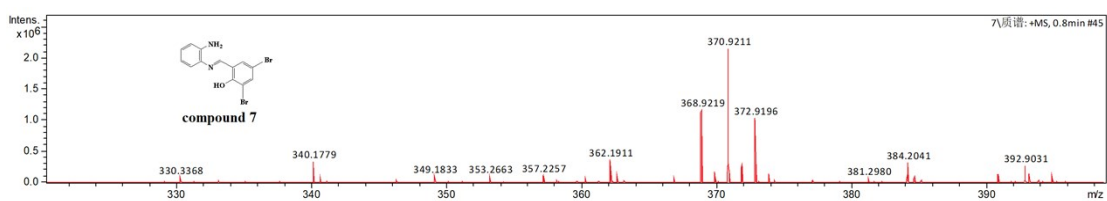

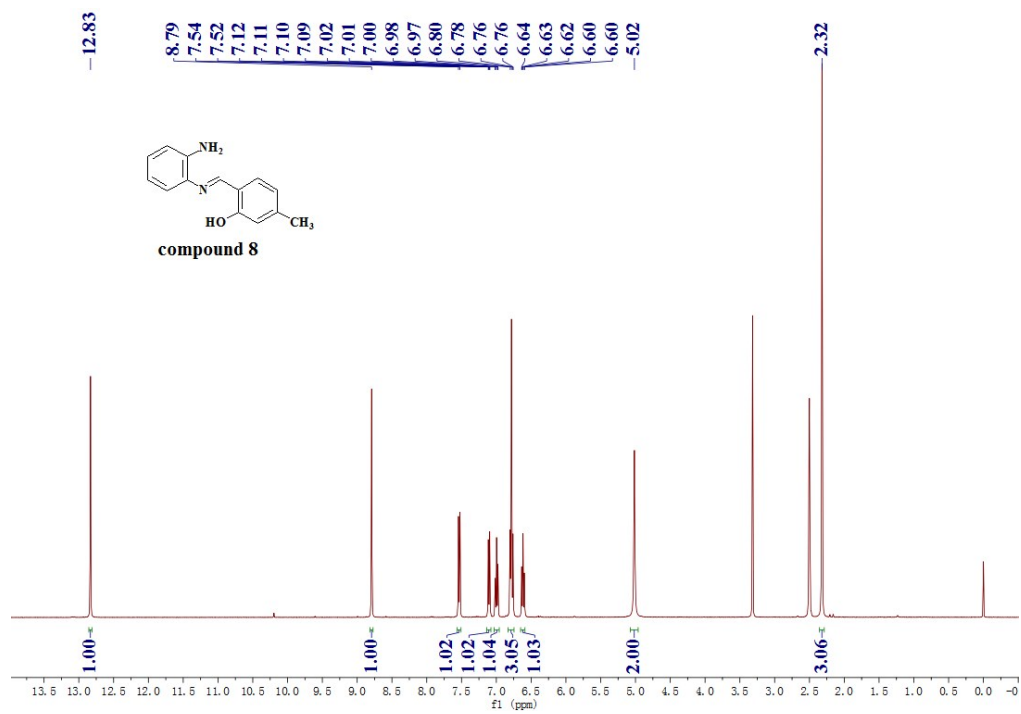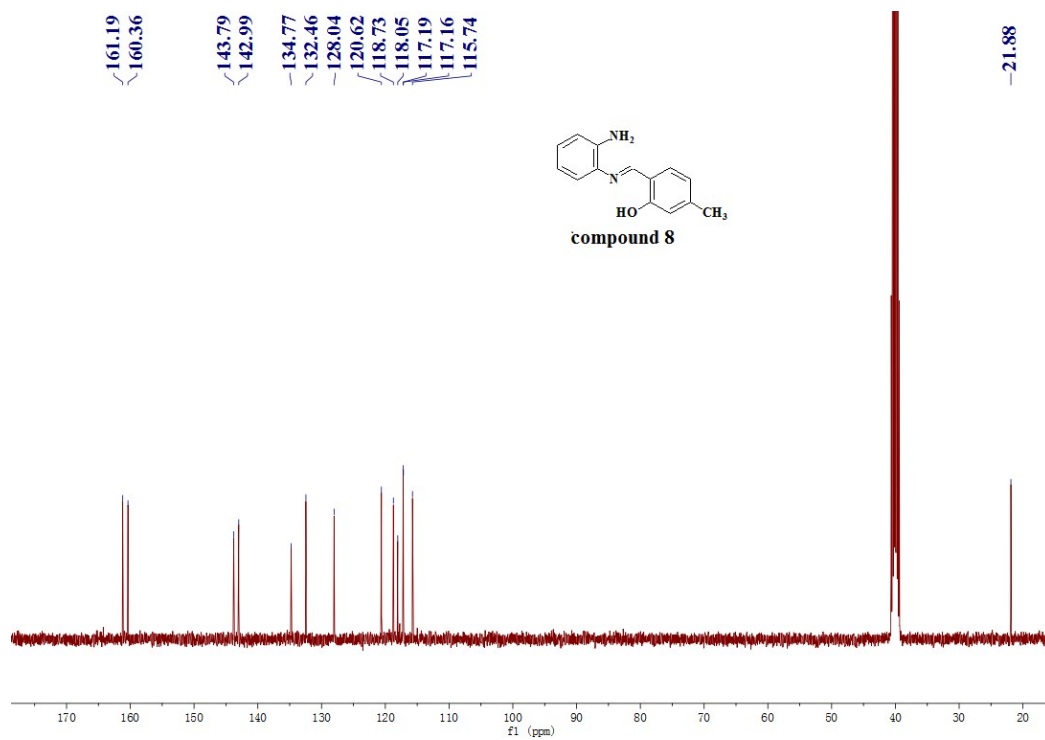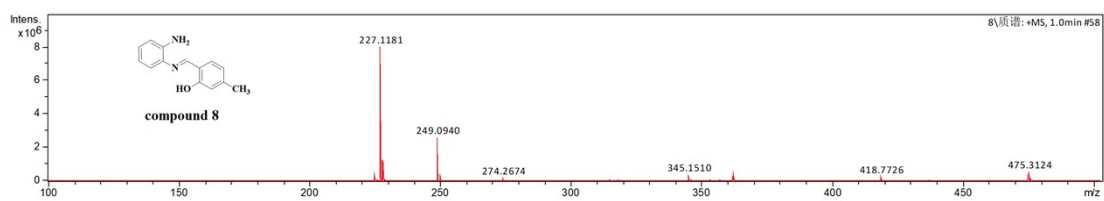

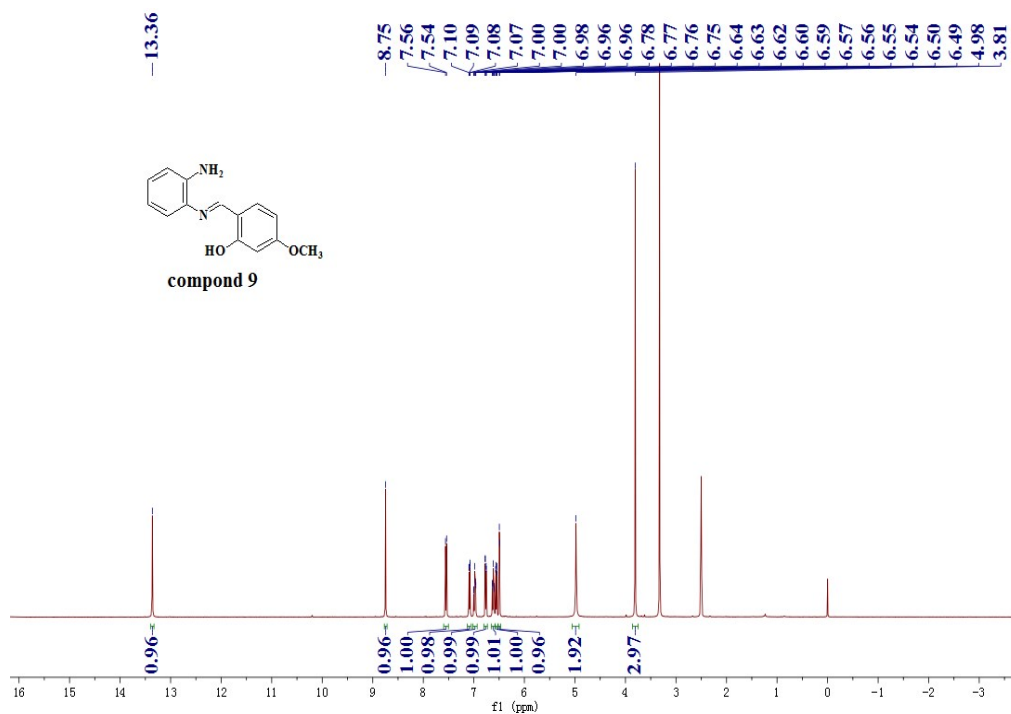

$^1\text{H}$  NMR spectrum of APMP-8 in DMSO-d<sub>6</sub>.

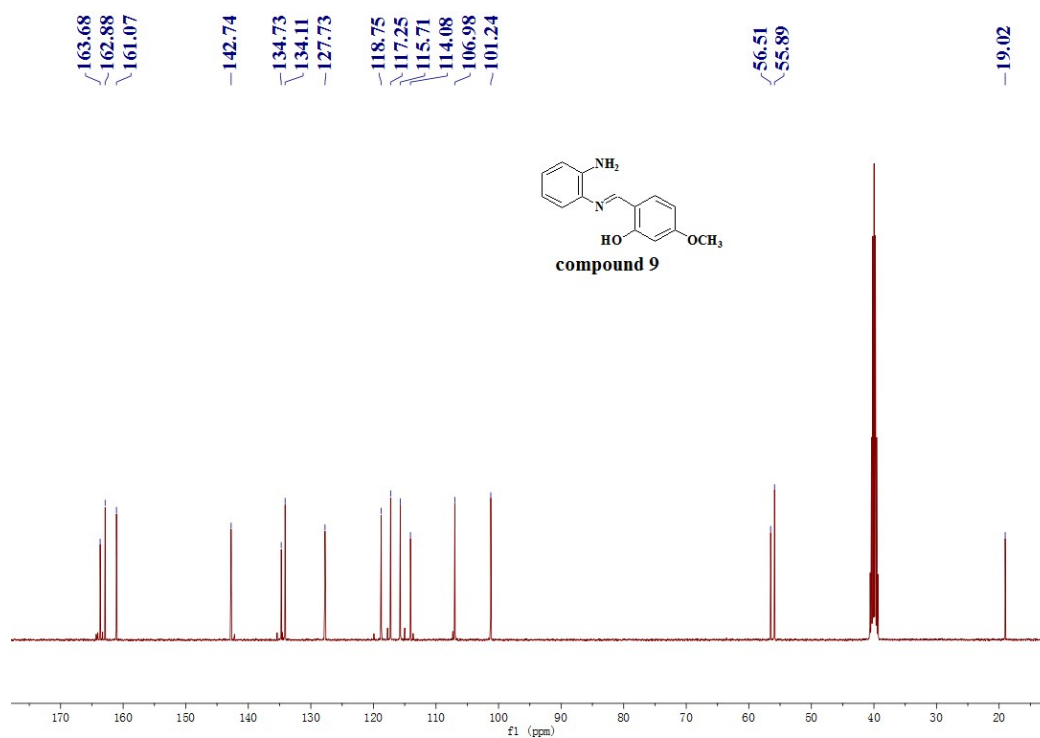

$^{13}\text{C}$  NMR spectrum of APMP-8 in DMSO-d<sub>6</sub>.

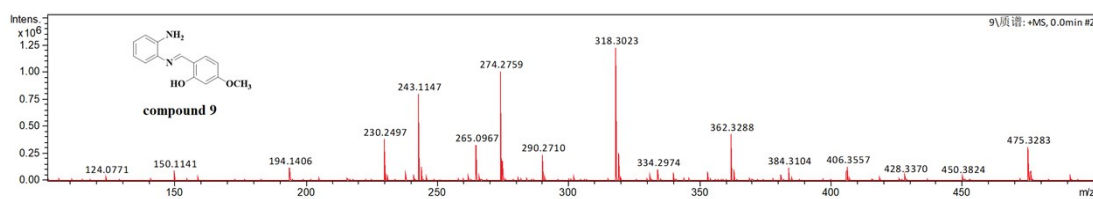

High-resolution mass spectra (HRMS) of APMP-8.

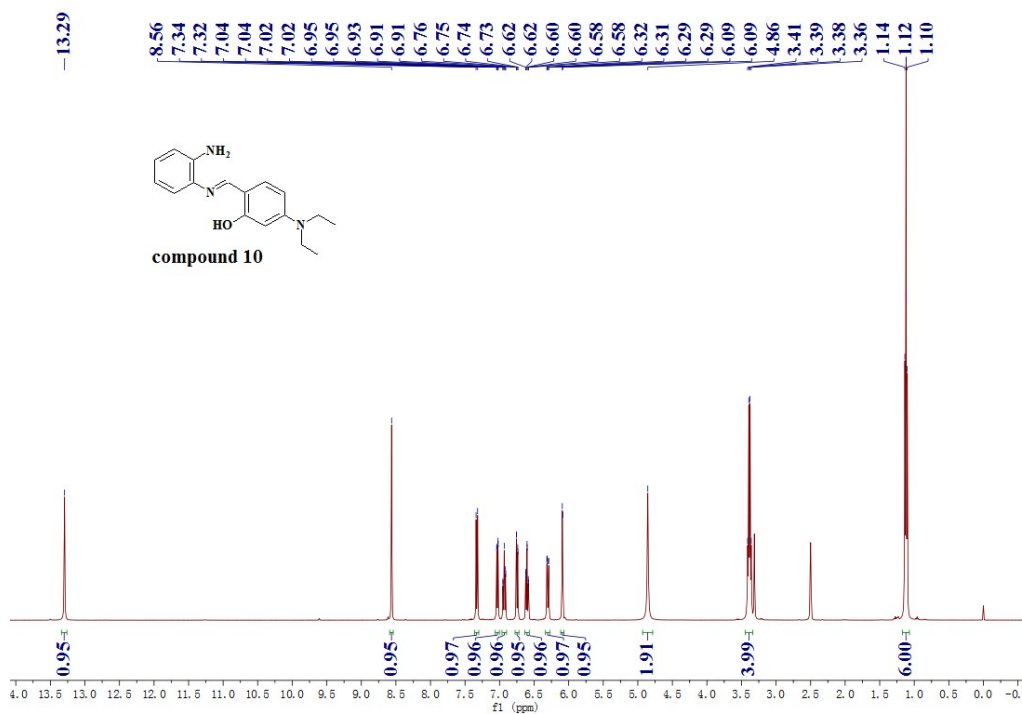

<sup>1</sup>H NMR spectrum of APMP-9 in DMSO-d<sub>6</sub>.

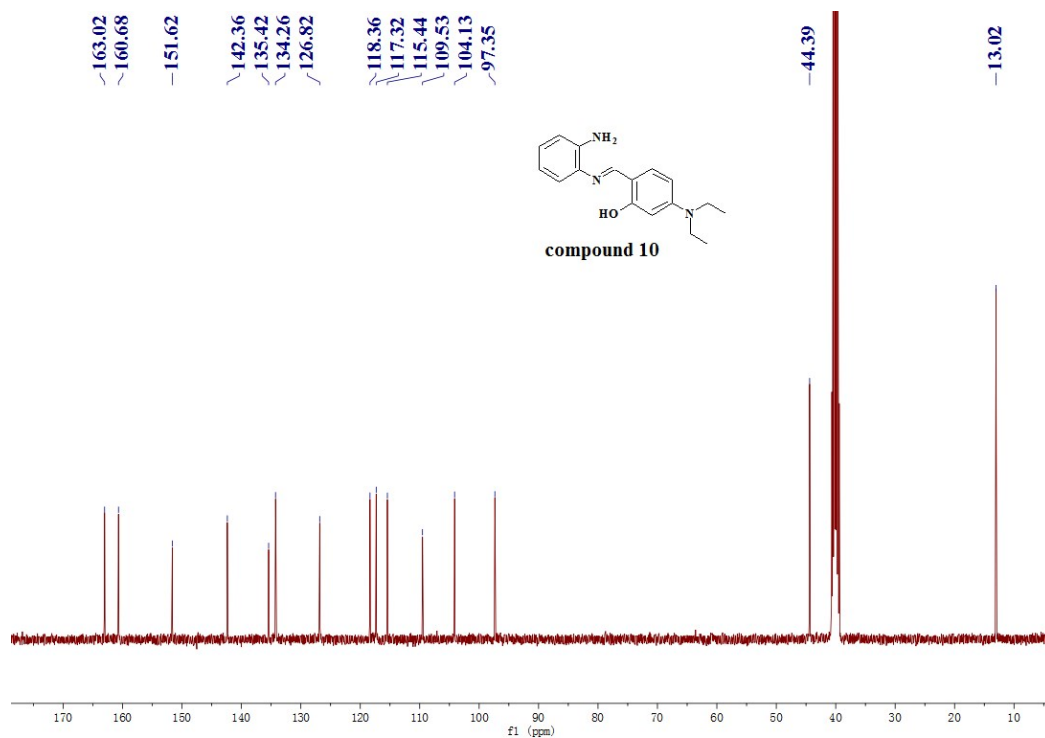

<sup>13</sup>C NMR spectrum of APMP-9 in DMSO-d<sub>6</sub>.

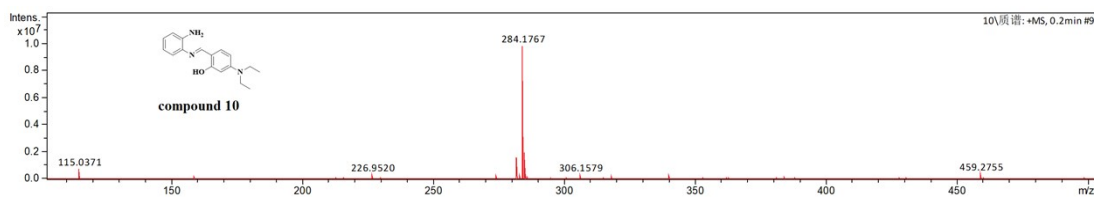

High-resolution mass spectra (HRMS) of APMP-9.

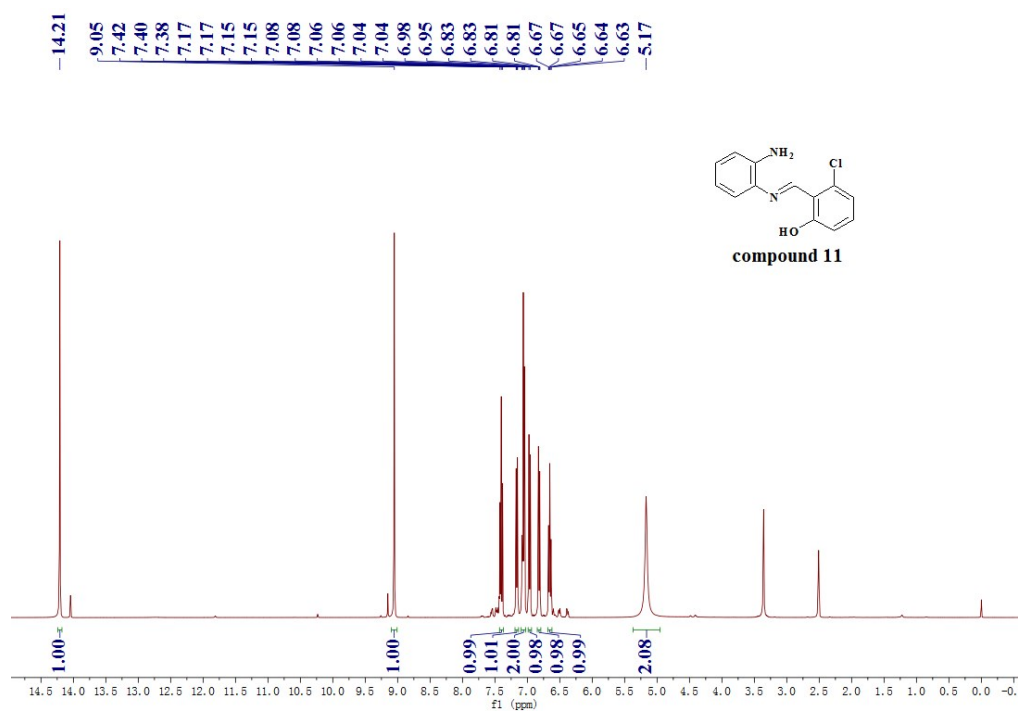

**<sup>1</sup>H NMR spectrum of APMP-10 in DMSO-d6.**

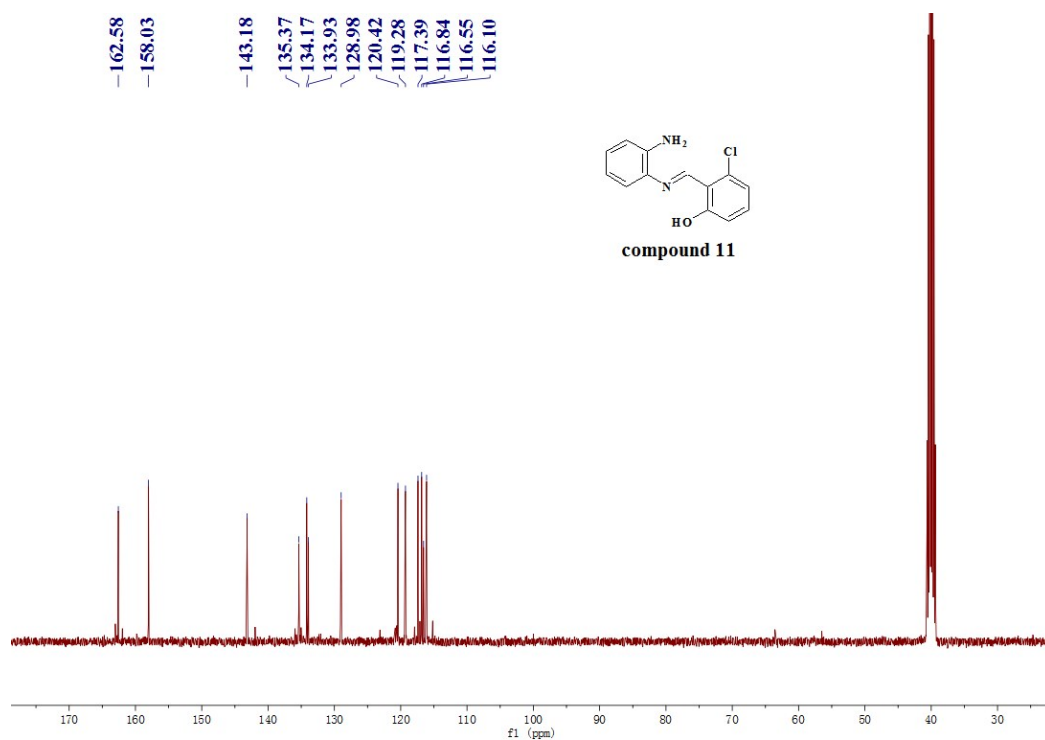

**<sup>13</sup>C NMR spectrum of APMP-10 in DMSO-d6.**

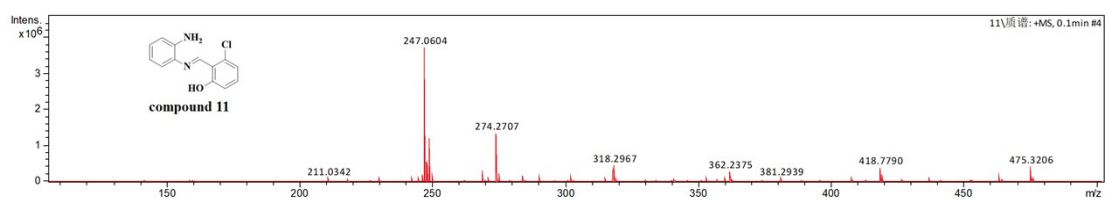

**High-resolution mass spectra (HRMS) of APMP-10.**

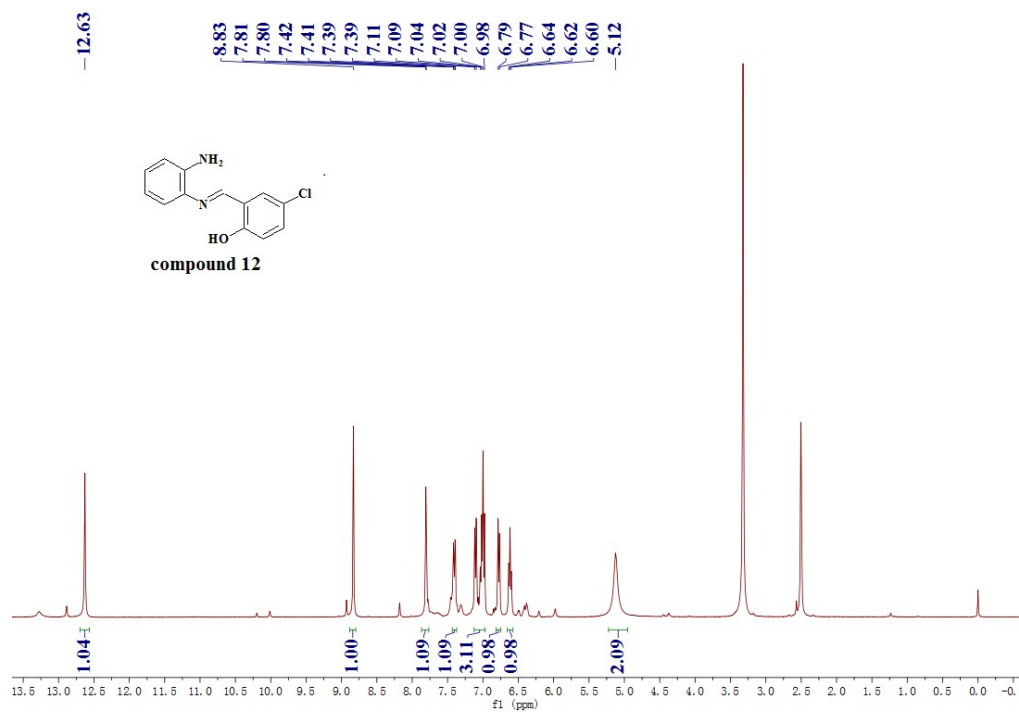

<sup>1</sup>H NMR spectrum of APMP-11 in DMSO-d<sub>6</sub>.

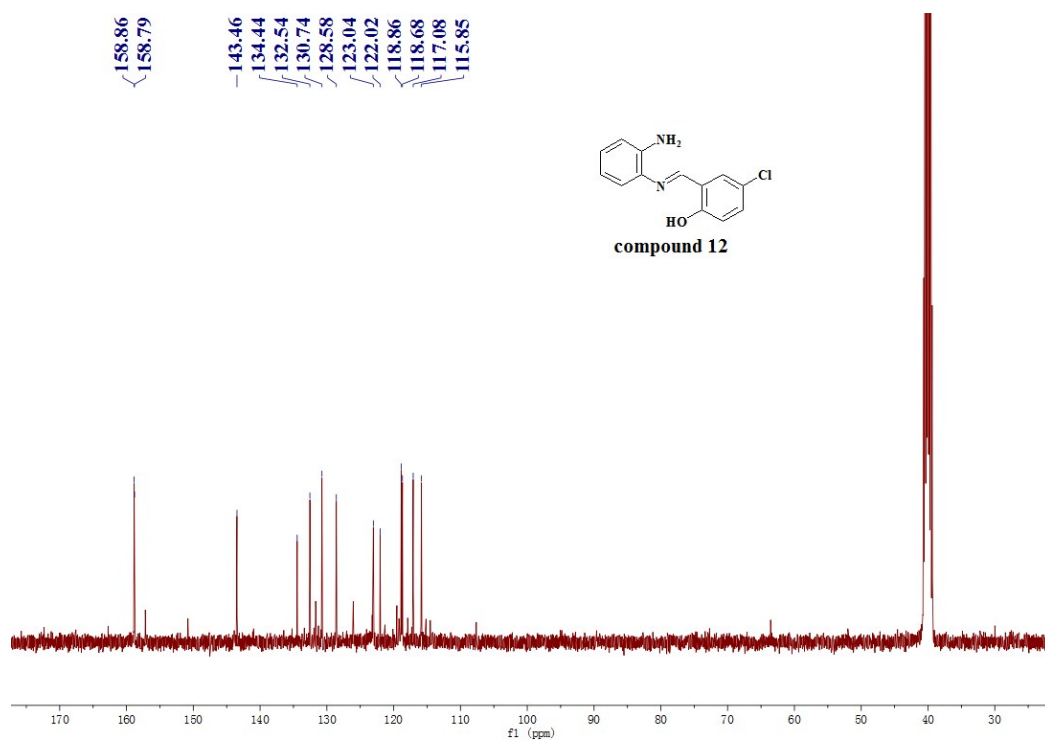

<sup>13</sup>C NMR spectrum of APMP-11 in DMSO-d<sub>6</sub>.

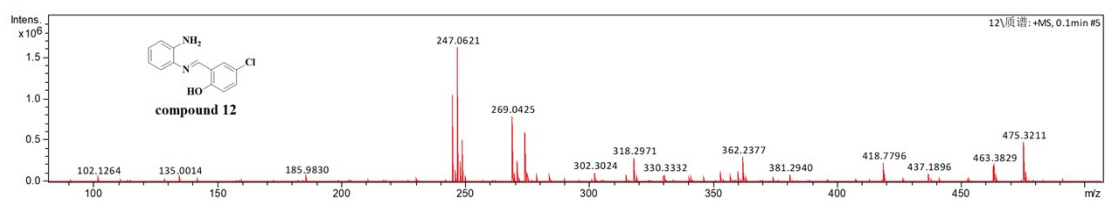

High-resolution mass spectra (HRMS) of APMP-11.



**Table S1** The FL properties of APMP and its derivatives.

| Compd.  | R <sup>2</sup> | R <sup>3</sup> | R <sup>4</sup>                                   | R <sup>5</sup> | $\lambda_{ex}$ [nm] | $\lambda_{em}$ [nm] | $\Delta_{H_2O}$ [nm] | In [a.u.] | $\Phi_F$ [%] | $\tau$ [k <sub>r</sub> , k <sub>nr</sub> ]<br>ns [ns <sup>-1</sup> , ns <sup>-1</sup> ] |
|---------|----------------|----------------|--------------------------------------------------|----------------|---------------------|---------------------|----------------------|-----------|--------------|-----------------------------------------------------------------------------------------|
| APMP-1  | —              | —              | F                                                | —              | 363                 | 478                 | 115                  | 472       | 13.58        | 0.78 [0.17,1.11]                                                                        |
| APMP-2  | —              | —              | N(CH <sub>2</sub> CH <sub>3</sub> ) <sub>2</sub> | —              | 362                 | 499                 | 137                  | 658       | 4.85         | 0.74 [0.07,1.29]                                                                        |
| APMP-3  | —              | —              | CH <sub>3</sub>                                  | —              | 377                 | 505                 | 128                  | 445       | 19.19        | 0.78 [0.25,1.04]                                                                        |
| APMP-4  | —              | —              | OCH <sub>3</sub>                                 | —              | 346                 | 511                 | 165                  | 313       | 7.11         | 0.79 [0.09,1.18]                                                                        |
| APMP-5  | —              | Cl             | —                                                | —              | 365                 | 517                 | 152                  | 151       | 6.06         | 1.38 [0.04,0.68]                                                                        |
| APMP    | —              | —              | —                                                | —              | 390                 | 523                 | 133                  | 229       | 23.69        | 0.10 [2.37,7.63]                                                                        |
| APMP-6  | —              | —              | Cl                                               | —              | 382                 | 525                 | 143                  | 401       | 27.56        | 0.84 [0.33,0.86]                                                                        |
| APMP-7  | —              | F              | —                                                | F              | 393                 | 528                 | 135                  | 319       | 5.23         | 1.07 [0.05,0.89]                                                                        |
| APMP-8  | —              | —              | Br                                               | —              | 387                 | 535                 | 136                  | 222       | 23.9         | 0.96 [0.25,0.79]                                                                        |
| APMP-9  | Cl             | —              | —                                                | —              | 376                 | 543                 | 167                  | 114       | 15.97        | 1.12 [0.14,0.75]                                                                        |
| APMP-10 | —              | Cl             | —                                                | Cl             | 446                 | 563                 | 117                  | 271       | 17.74        | 0.97 [0.18,0.85]                                                                        |
| APMP-11 | —              | Br             | —                                                | Br             | 372                 | 574                 | 202                  | 123       | 1.21         | 0.88 [0.01,1.12]                                                                        |

The quantum yield ( $\Phi_F$ ) and lifetime of APMP and its derivatives were investigated by using the time-resolved fluorescence spectroscopy and calibrated integrating sphere of absolute method, respectively. We found that the different positions of substituents on the benzene ring also have great influence on the fluorescence properties of the developed AIEgens. As shown in Table S1, the  $\Phi_F$  and fluorescence lifetime of APMP and its derivatives differ greatly from each other, and the substituting position of the same group on benzene ring also has a great influence on the fluorescence properties of AIEgens. Contrary to the above phenomenon, there is discernible regularity in the radiation and non-radiation rates of ketones calculated from  $\Phi_F$  and fluorescence lifetime, and it could be observed that the  $\Phi_F$  of the electron-withdrawing groups are basically higher than that of the electron-donating groups.

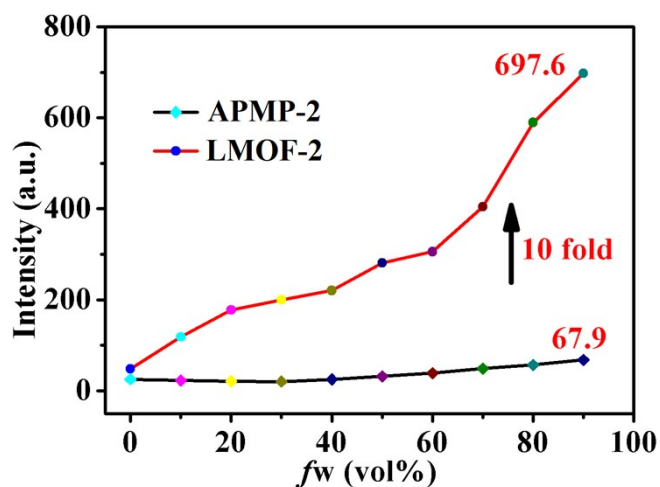**Figure S7** The enhanced fluorescence intensities of APMP-2/ZIF-8, and a fluorescence intensity

of APMP-2/ZIF-8 over 10 times the original fluorescence of APMP-2 was observed when the water fraction reached 90%.

### 3. Molecular geometries of APMP derivatives in the ground ( $S_0$ ) and excited ( $S_1$ ).

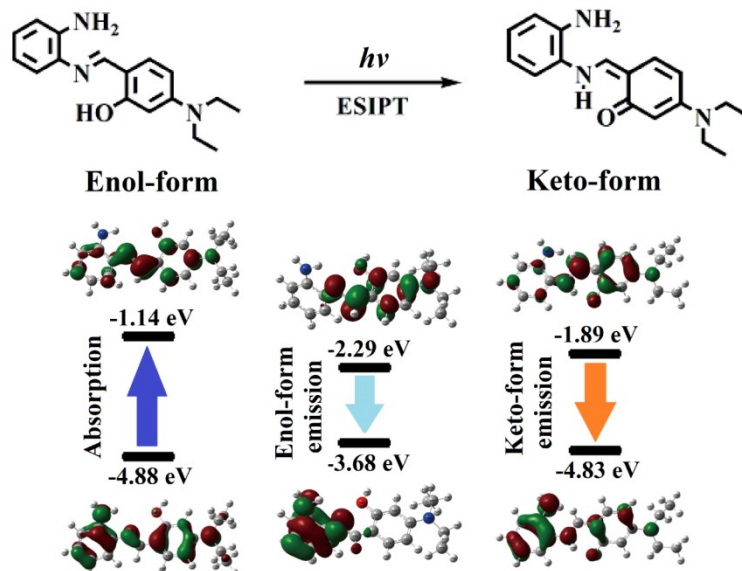

**Figure S8** Molecular orbitals and energy levels of APMP-2 in the ground ( $S_0$ ) and excited ( $S_1$ ) states for enol and keto forms calculated with TD-DFT at the level of B3LYP/6-31G\* based on solvation of water.

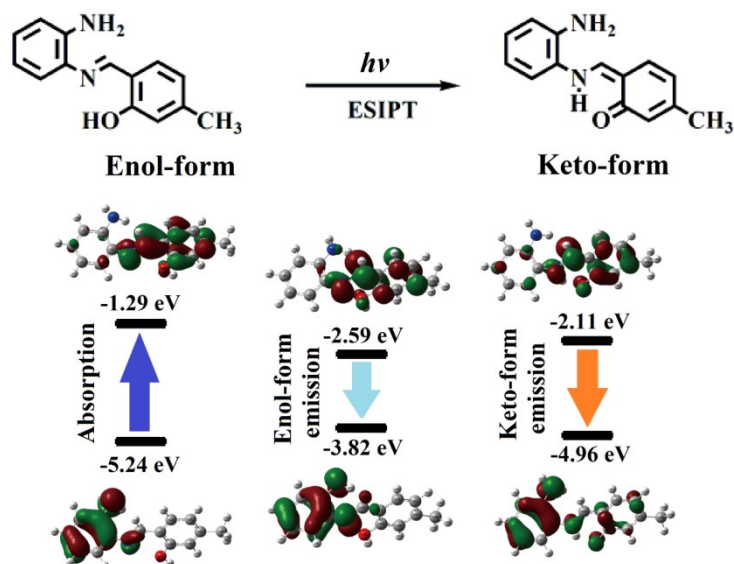

**Figure S9** Molecular orbitals and energy levels of APMP-3 in the ground ( $S_0$ ) and excited ( $S_1$ ) states for enol and keto forms calculated with TD-DFT at the level of B3LYP/6-31G\* based on solvation of water.

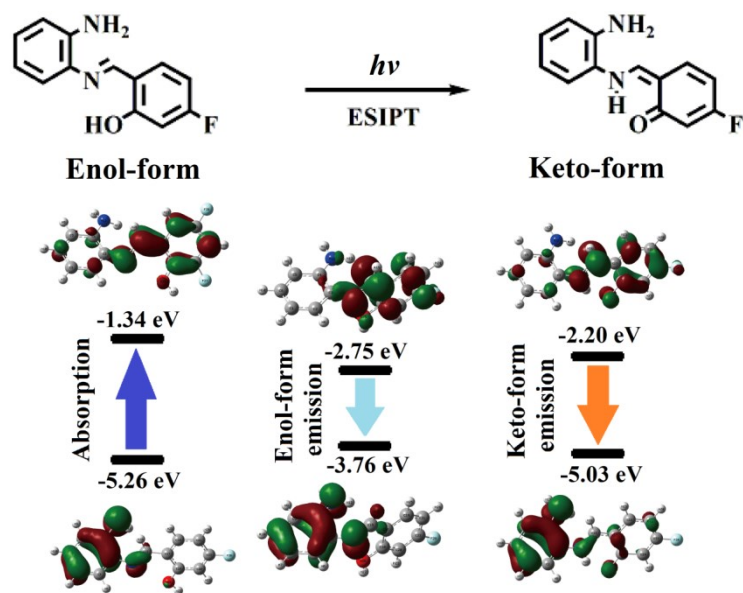

**Figure S10** Molecular orbitals and energy levels of APMP-1 in the ground ( $S_0$ ) and excited ( $S_1$ ) states for enol and keto forms calculated with TD-DFT at the level of B3LYP/6-31G\* based on solvation of water.

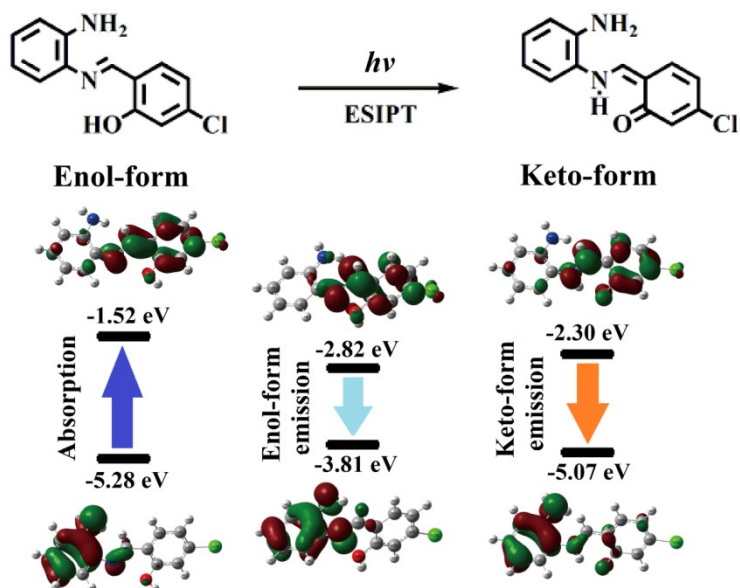

**Figure S11** Molecular orbitals and energy levels of APMP-7 in the ground ( $S_0$ ) and excited ( $S_1$ ) states for enol and keto forms calculated with TD-DFT at the level of B3LYP/6-31G\* based on solvation of water.

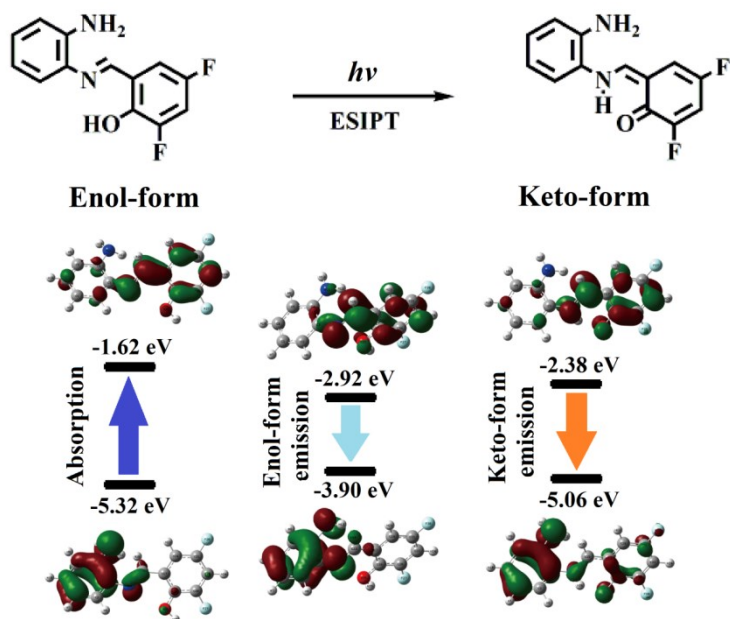

**Figure S12** Molecular orbitals and energy levels of APMP-8 in the ground ( $S_0$ ) and excited ( $S_1$ ) states for enol and keto forms calculated with TD-DFT at the level of B3LYP/6-31G\* based on solvation of water.

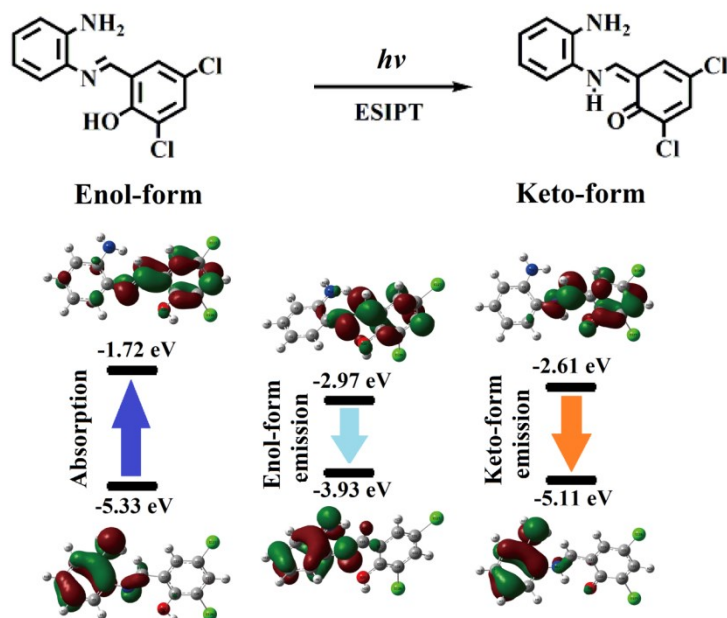

**Figure S13** Molecular orbitals and energy levels of APMP-11 in the ground ( $S_0$ ) and excited ( $S_1$ ) states for enol and keto forms calculated with TD-DFT at the level of B3LYP/6-31G\* based on solvation of water.

#### 4. Molecular frontier orbitals and detail calculation data

**Table S2** The frontier orbital energy levels of Enol-form, Keto-form, and the energy gap of APMP-2, APMP-3, APMP-4, APMP-1, APMP-7, APMP-8, APMP-11.

| AIEgens   | Energy level<br>(HOMO) | Energy level<br>(LUMO) | Energy<br>gap |
|-----------|------------------------|------------------------|---------------|
| APMP-2    | -4.88                  | -1.14                  | 3.74          |
| Enol-form | -3.68                  | -2.29                  | 1.39          |
| Keto-form | -4.83                  | -1.89                  | 2.94          |
| APMP-3    | -5.24                  | -1.29                  | 3.95          |
| Enol-form | -3.82                  | -2.59                  | 1.23          |
| Keto-form | -4.96                  | -2.11                  | 2.85          |
| APMP-4    | -5.26                  | -1.38                  | 3.88          |
| Enol-form | -3.76                  | -2.76                  | 1.00          |
| Keto-form | -4.99                  | -2.18                  | 2.81          |
| APMP-1    | -5.28                  | -1.52                  | 3.76          |
| Enol-form | -3.81                  | -2.82                  | 0.99          |
| Keto-form | -5.07                  | -2.30                  | 2.77          |
| APMP-7    | -5.26                  | -1.34                  | 3.92          |
| Enol-form | -3.76                  | -2.75                  | 1.01          |
| Keto-form | -5.03                  | -2.20                  | 2.83          |
| APMP-8    | -5.32                  | -1.62                  | 3.70          |
| Enol-form | -3.90                  | -2.92                  | 0.98          |
| Keto-form | -5.06                  | -2.38                  | 2.68          |
| APMP-11   | -5.33                  | -1.72                  | 3.61          |
| Enol-form | -3.93                  | -2.97                  | 0.96          |
| Keto-form | -5.11                  | -2.61                  | 2.50          |

**Table S3** Calculation data of APMP-2, APMP-3, APMP-4, APMP-1, APMP-7, APMP-8, APMP-11 in  $S_0$  state. <sup>a)</sup>

| AIEgen | States          | Configurations              | E<br>(eV) | $\lambda$ (nm) | $f_{os}$ |
|--------|-----------------|-----------------------------|-----------|----------------|----------|
| APMP-2 | S <sub>01</sub> | H→L (92.26%)                | 3.28      | 378.07         | 0.89     |
|        | S <sub>02</sub> | H-1→L(89.80%),H→L(6.46%)    | 3.87      | 320.02         | 0.35     |
|        | S <sub>03</sub> | H-2→L (59.49%)              | 4.27      | 290.41         | 0.00     |
| APMP-3 | S <sub>01</sub> | H→L (96.91%)                | 3.19      | 389.11         | 0.13     |
|        | S <sub>02</sub> | H-1→L (58.68%)              | 4.12      | 301.05         | 0.09     |
|        | S <sub>03</sub> | H-2→L(58.39%),H-1→L(30.97%) | 4.23      | 293.19         | 0.15     |
| APMP-4 | S <sub>01</sub> | H→L (97.02%)                | 3.15      | 393.58         | 0.17     |
|        | S <sub>02</sub> | H-1→L(66.95%),H-3→L(4.99%)  | 4.07      | 304.85         | 0.08     |
|        | S <sub>03</sub> | H-2→L(66.31%),H-1→L(24.74%) | 4.20      | 294.99         | 0.12     |
| APMP-1 | S <sub>01</sub> | H→L (97.18%)                | 3.06      | 404.93         | 0.19     |

|         |                 |                             |      |        |      |
|---------|-----------------|-----------------------------|------|--------|------|
| APMP-7  | S <sub>02</sub> | H-1→L(77.52%),H-2→L(13.92%) | 3.98 | 311.51 | 0.09 |
|         | S <sub>03</sub> | H-2→L (72.10%)              | 4.24 | 292.18 | 0.21 |
|         | S <sub>01</sub> | H→L (97.00%)                | 3.18 | 389.75 | 0.16 |
| APMP-8  | S <sub>02</sub> | H-1→L(72.20%),H-2→L(18.61%) | 4.11 | 301.85 | 0.06 |
|         | S <sub>03</sub> | H-2→L(64.99%),H→L+1(6.00%)  | 4.35 | 285.11 | 0.19 |
|         | S <sub>01</sub> | H→L (97.21%)                | 3.03 | 409.08 | 0.21 |
| APMP-11 | S <sub>02</sub> | H-1→L (72.17%)              | 3.91 | 317.09 | 0.11 |
|         | S <sub>03</sub> | H-2→L(68.99%),H-1→L(22.23%) | 4.02 | 308.67 | 0.06 |
|         | S <sub>01</sub> | H→L (97.43%)                | 2.95 | 420.84 | 0.20 |
|         | S <sub>02</sub> | H-1→L(81.18%),H-2→L(9.71%)  | 3.85 | 322.29 | 0.09 |
|         | S <sub>03</sub> | H-2→L(77.06%),H→L+1(6.17%)  | 4.04 | 306.74 | 0.09 |

<sup>a)</sup> Calculated with TD-DFT at the level of B3LYP/6-31G\* based on solvation of water, in which the vertical excitation as linear response solvation was used. S<sub>01</sub>, S<sub>02</sub> and S<sub>03</sub> denoted the first and second vertical transition from S<sub>0</sub> state to S<sub>1</sub>, S<sub>2</sub> and S<sub>3</sub> states, respectively, and  $f_{os}$  denoted oscillator strength of vertical transition.

**Table S4** Calculation data of APMP-2, APMP-3, APMP-4, APMP-1, APMP-7, APMP-8, APMP-11 in S<sub>1</sub> state. <sup>a)</sup>

| AI Egen | Form | Configurations    | E (eV) | $\lambda$ (nm) | $f_{os}$ |
|---------|------|-------------------|--------|----------------|----------|
| APMP-2  | Enol | H→L (98.79%)<br>) | 0.51   | /              | 0.00     |
|         | Keto | H→L (98.84%)<br>) | 2.39   | 519.44         | 0.86     |
| APMP-3  | Enol | H→L (~100%)       | 0.25   | /              | 0.00     |
|         | Keto | H→L (99.19%)<br>) | 2.27   | 546.38         | 0.52     |
| APMP-4  | Enol | H→L (~100%)       | 0.06   | /              | 0.00     |
|         | Keto | H→L (99.16%)<br>) | 2.24   | 553.88         | 0.46     |
| APMP-1  | Enol | H→L (~100%)       | 0.06   | /              | 0.00     |
|         | Keto | H→L (99.21%)<br>) | 2.20   | 563.07         | 0.44     |
| APMP-7  | Enol | H→L (~100%)       | 0.06   | /              | 0.00     |
|         | Keto | H→L (99.28%)<br>) | 2.38   | 521.26         | 0.44     |
| APMP-8  | Enol | H→L (99.24%)<br>) | 0.07   | /              | 0.00     |
|         | Keto | H→L (99.16%)<br>) | 2.19   | 565.77         | 0.48     |

|         |      |                   |      |        |      |
|---------|------|-------------------|------|--------|------|
| APMP-11 | Enol | H→L (98.78%)<br>) | 0.07 | /      | 0.00 |
|         | Keto | H→L (99.24%)<br>) | 2.12 | 585.03 | 0.38 |

<sup>a)</sup> Calculated with TD-DFT at the level of B3LYP/6-31G\* based on solvation of water, in which the vertical excitation as linear response solvation was used.  $f_{os}$  was denoted oscillator strength of the first vertical irradiation for enol-form or keto-form.

**Table S5** The specific bond lengths and dihedral angles of APMP-2 in  $S_0$  and  $S_1$  states. <sup>a)</sup>

|                                                                    | Enol-form@ $S_0$                                                                  | Enol-form@ $S_1$                                                                   | Keto-form@ $S_1$                                                                    |
|--------------------------------------------------------------------|-----------------------------------------------------------------------------------|------------------------------------------------------------------------------------|-------------------------------------------------------------------------------------|
|                                                                    |  |  |  |
| O <sub>40</sub> -H <sub>41</sub>                                   | 0.974                                                                             | 0.974                                                                              | /                                                                                   |
| N <sub>14</sub> -H <sub>40</sub>                                   | 3.803                                                                             | 3.790                                                                              | 1.036                                                                               |
| C <sub>4</sub> -C <sub>3</sub> -N <sub>14</sub> -C <sub>15</sub>   | 148.304                                                                           | -177.823                                                                           | 23.328                                                                              |
| C <sub>3</sub> -N <sub>14</sub> -C <sub>15</sub> -C <sub>17</sub>  | 176.961                                                                           | 96.357                                                                             | -169.592                                                                            |
| N <sub>14</sub> -C <sub>15</sub> -C <sub>17</sub> -C <sub>18</sub> | -0.622                                                                            | -2.925                                                                             | 1.095                                                                               |
| C <sub>15</sub> -C <sub>17</sub> -C <sub>18</sub> -O <sub>40</sub> | 0.013                                                                             | -2.507                                                                             | 0.523                                                                               |
| C <sub>17</sub> -C <sub>18</sub> -O <sub>40</sub> -H <sub>41</sub> | -179.850                                                                          | 178.024                                                                            | /                                                                                   |

<sup>a)</sup> Calculated with TD-DFT at the level of B3LYP/6-31G\* based on solvation of water. The units of bond lengths and dihedral angles are Å and degree, respectively.

**Table S6** The specific bond lengths and dihedral angles of APMP-3 in  $S_0$  and  $S_1$  states. <sup>a)</sup>

|                                                                    | Enol-form@ $S_0$                                                                    | Enol-form@ $S_1$                                                                     | Keto-form@ $S_1$                                                                      |
|--------------------------------------------------------------------|-------------------------------------------------------------------------------------|--------------------------------------------------------------------------------------|---------------------------------------------------------------------------------------|
|                                                                    |  |  |  |
| O <sub>40</sub> -H <sub>41</sub>                                   | 0.974                                                                               | 0.974                                                                                | /                                                                                     |
| N <sub>14</sub> -H <sub>40</sub>                                   | 3.799                                                                               | 3.782                                                                                | 3.782                                                                                 |
| C <sub>4</sub> -C <sub>3</sub> -N <sub>14</sub> -C <sub>15</sub>   | -179.850                                                                            | 2.103                                                                                | 32.782                                                                                |
| C <sub>3</sub> -N <sub>14</sub> -C <sub>15</sub> -C <sub>17</sub>  | -179.570                                                                            | -103.330                                                                             | -172.395                                                                              |
| N <sub>14</sub> -C <sub>15</sub> -C <sub>17</sub> -C <sub>18</sub> | 2.723                                                                               | 15.691                                                                               | 3.684                                                                                 |
| C <sub>15</sub> -C <sub>17</sub> -C <sub>18</sub> -O <sub>40</sub> | 0.360                                                                               | 0.984                                                                                | 0.899                                                                                 |
| C <sub>17</sub> -C <sub>18</sub> -O <sub>40</sub> -H <sub>41</sub> | 178.532                                                                             | -178.858                                                                             | /                                                                                     |

<sup>a)</sup> Calculated with TD-DFT at the level of B3LYP/6-31G\* based on solvation of water. The units of bond lengths and dihedral angles are Å and degree, respectively.

**Table S7** The specific bond lengths and dihedral angles of APMP-4 in  $S_0$  and  $S_1$  states. <sup>a)</sup>

|                                                                    | Enol-form@ $S_0$                                                                  | Enol-form@ $S_1$                                                                   | Keto-form@ $S_1$                                                                    |
|--------------------------------------------------------------------|-----------------------------------------------------------------------------------|------------------------------------------------------------------------------------|-------------------------------------------------------------------------------------|
|                                                                    |  |  |  |
| O <sub>40</sub> -H <sub>41</sub>                                   | 0.974                                                                             | 0.973                                                                              | /                                                                                   |
| N <sub>14</sub> -H <sub>40</sub>                                   | 3.790                                                                             | 3.774                                                                              | 1.033                                                                               |
| C <sub>4</sub> -C <sub>3</sub> -N <sub>14</sub> -C <sub>15</sub>   | 54.688                                                                            | 2.120                                                                              | 33.492                                                                              |
| C <sub>3</sub> -N <sub>14</sub> -C <sub>15</sub> -C <sub>17</sub>  | -179.695                                                                          | -102.157                                                                           | -170.054                                                                            |
| N <sub>14</sub> -C <sub>15</sub> -C <sub>17</sub> -C <sub>18</sub> | 1.205                                                                             | 17.413                                                                             | 3.805                                                                               |
| C <sub>15</sub> -C <sub>17</sub> -C <sub>18</sub> -O <sub>40</sub> | -0.099                                                                            | 0.269                                                                              | -0.018                                                                              |
| C <sub>17</sub> -C <sub>18</sub> -O <sub>40</sub> -H <sub>41</sub> | 179.852                                                                           | 178.018                                                                            | /                                                                                   |

<sup>a)</sup> Calculated with TD-DFT at the level of B3LYP/6-31G\* based on solvation of water. The units of bond lengths and dihedral angles are Å and degree, respectively.

**Table S8** The specific bond lengths and dihedral angles of APMP-1 in  $S_0$  and  $S_1$  states. <sup>a)</sup>

|                                                                    | Enol-form@ $S_0$                                                                    | Enol-form@ $S_1$                                                                     | Keto-form@ $S_1$                                                                      |
|--------------------------------------------------------------------|-------------------------------------------------------------------------------------|--------------------------------------------------------------------------------------|---------------------------------------------------------------------------------------|
|                                                                    |  |  |  |
| O <sub>40</sub> -H <sub>41</sub>                                   | 0.974                                                                               | 0.973                                                                                | /                                                                                     |
| N <sub>14</sub> -H <sub>40</sub>                                   | 3.781                                                                               | 3.758                                                                                | 1.031                                                                                 |
| C <sub>4</sub> -C <sub>3</sub> -N <sub>14</sub> -C <sub>15</sub>   | 52.67309                                                                            | 1.7644                                                                               | 41.72782                                                                              |
| C <sub>3</sub> -N <sub>14</sub> -C <sub>15</sub> -C <sub>17</sub>  | -179.88614                                                                          | -100.38991                                                                           | -178.68744                                                                            |
| N <sub>14</sub> -C <sub>15</sub> -C <sub>17</sub> -C <sub>18</sub> | 2.50728                                                                             | 12.90955                                                                             | 3.35026                                                                               |
| C <sub>15</sub> -C <sub>17</sub> -C <sub>18</sub> -O <sub>40</sub> | 0.11369                                                                             | -1.15782                                                                             | 0.54082                                                                               |
| C <sub>17</sub> -C <sub>18</sub> -O <sub>40</sub> -H <sub>41</sub> | 179.04552                                                                           | -177.47064                                                                           | /                                                                                     |

<sup>a)</sup> Calculated with TD-DFT at the level of B3LYP/6-31G\* based on solvation of water. The units of bond lengths and dihedral angles are Å and degree, respectively.

**Table S9** The specific bond lengths and dihedral angles of APMP-7 in  $S_0$  and  $S_1$  states. <sup>a)</sup>

|  | Enol-form@ $S_0$                                                                    | Enol-form@ $S_1$                                                                     | Keto-form@ $S_1$                                                                      |
|--|-------------------------------------------------------------------------------------|--------------------------------------------------------------------------------------|---------------------------------------------------------------------------------------|
|  |  |  |  |



|                                                                    |          |          |          |
|--------------------------------------------------------------------|----------|----------|----------|
| O <sub>40</sub> -H <sub>41</sub>                                   | 0.974    | 0.973    | /        |
| N <sub>14</sub> -H <sub>40</sub>                                   | 3.786    | 3.772    | 1.029    |
| C <sub>4</sub> -C <sub>3</sub> -N <sub>14</sub> -C <sub>15</sub>   | 56.428   | 2.764    | 36.930   |
| C <sub>3</sub> -N <sub>14</sub> -C <sub>15</sub> -C <sub>17</sub>  | -179.785 | -102.817 | -174.527 |
| N <sub>14</sub> -C <sub>15</sub> -C <sub>17</sub> -C <sub>18</sub> | 1.946    | 16.181   | 2.779    |
| C <sub>15</sub> -C <sub>17</sub> -C <sub>18</sub> -O <sub>40</sub> | 0.162    | -0.768   | 0.165    |
| C <sub>17</sub> -C <sub>18</sub> -O <sub>40</sub> -H <sub>41</sub> | 179.026  | -179.462 | /        |

a) Calculated with TD-DFT at the level of B3LYP/6-31G\* based on solvation of water. The units of bond lengths and dihedral angles are Å and degree, respectively.

**Table S10** The specific bond lengths and dihedral angles of APMP-8 in S<sub>0</sub> and S<sub>1</sub> states. a)

|                                                                    | Enol-form@S <sub>0</sub>                                                          | Enol-form@S <sub>1</sub>                                                           | Keto-form@S <sub>1</sub>                                                            |
|--------------------------------------------------------------------|-----------------------------------------------------------------------------------|------------------------------------------------------------------------------------|-------------------------------------------------------------------------------------|
|                                                                    |  |  |  |
| O <sub>40</sub> -H <sub>41</sub>                                   | 0.975                                                                             | 0.975                                                                              | /                                                                                   |
| N <sub>14</sub> -H <sub>40</sub>                                   | 3.802                                                                             | 3.789                                                                              | 1.031                                                                               |
| C <sub>4</sub> -C <sub>3</sub> -N <sub>14</sub> -C <sub>15</sub>   | 45.87178                                                                          | 2.02539                                                                            | 39.07799                                                                            |
| C <sub>3</sub> -N <sub>14</sub> -C <sub>15</sub> -C <sub>17</sub>  | 179.77356                                                                         | -100.41746                                                                         | -173.75028                                                                          |
| N <sub>14</sub> -C <sub>15</sub> -C <sub>17</sub> -C <sub>18</sub> | 1.31516                                                                           | 12.49268                                                                           | 3.74114                                                                             |
| C <sub>15</sub> -C <sub>17</sub> -C <sub>18</sub> -O <sub>40</sub> | 0.04738                                                                           | 0.07607                                                                            | 0.59029                                                                             |
| C <sub>17</sub> -C <sub>18</sub> -O <sub>40</sub> -H <sub>41</sub> | 179.34455                                                                         | -179.87095                                                                         | /                                                                                   |

a) Calculated with TD-DFT at the level of B3LYP/6-31G\* based on solvation of water. The units of bond lengths and dihedral angles are Å and degree, respectively.

**Table S11** The specific bond lengths and dihedral angles of APMP-11 in S<sub>0</sub> and S<sub>1</sub> states. a)

|                                                                    | Enol-form@S <sub>0</sub>                                                            | Enol-form@S <sub>1</sub>                                                             | Keto-form@S <sub>1</sub>                                                              |
|--------------------------------------------------------------------|-------------------------------------------------------------------------------------|--------------------------------------------------------------------------------------|---------------------------------------------------------------------------------------|
|                                                                    |  |  |  |
| O <sub>40</sub> -H <sub>41</sub>                                   | 0.976                                                                               | 0.975                                                                                | /                                                                                     |
| N <sub>14</sub> -H <sub>40</sub>                                   | 3.748                                                                               | 3.742                                                                                | 1.031                                                                                 |
| C <sub>4</sub> -C <sub>3</sub> -N <sub>14</sub> -C <sub>15</sub>   | 47.601                                                                              | 2.494                                                                                | 67.791                                                                                |
| C <sub>3</sub> -N <sub>14</sub> -C <sub>15</sub> -C <sub>17</sub>  | -179.846                                                                            | -100.106                                                                             | 154.209                                                                               |
| N <sub>14</sub> -C <sub>15</sub> -C <sub>17</sub> -C <sub>18</sub> | 3.469                                                                               | 12.623                                                                               | -3.433                                                                                |
| C <sub>15</sub> -C <sub>17</sub> -C <sub>18</sub> -O <sub>40</sub> | -0.088                                                                              | -0.611                                                                               | 0.655                                                                                 |
| C <sub>17</sub> -C <sub>18</sub> -O <sub>40</sub> -H <sub>41</sub> | 179.578                                                                             | -179.843                                                                             | /                                                                                     |

a) Calculated with TD-DFT at the level of B3LYP/6-31G\* based on solvation of water. The units

of bond lengths and dihedral angles are Å and degree, respectively.

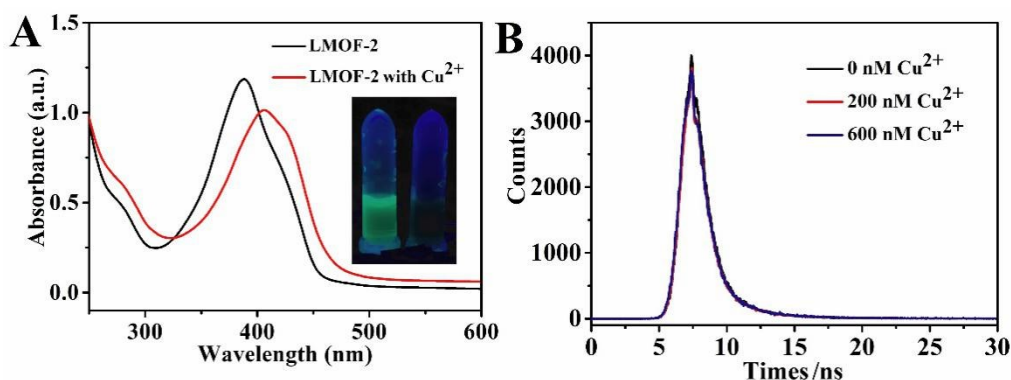

**Figure S14.** (A) UV-vis spectra of before (black line) and after (red line) the treatment by 50  $\mu\text{M}$   $\text{Cu}^{2+}$ ; Insert: the photographs of LMOF-2 dispersion in the (left) absence and (right) presence of  $\text{Cu}^{2+}$  (400 nM) under 365 nm UV light. (B) Fluorescence decay profiles of LMOF-2 obtained by treatment with different concentrations of  $\text{Cu}^{2+}$  were 0, 200, and 600 nM.

## 5. Detection $\text{Cu}^{2+}$ and application to water samples

The selectivity of the LMOF-2 FL sensing system was estimated and shown in **Figure 4A**. Besides  $\text{Cu}^{2+}$ , the effects of 15 other kinds of targets, including  $\text{Mn}^{2+}$ ,  $\text{Zn}^{2+}$ ,  $\text{Ag}^+$ ,  $\text{Mg}^{2+}$ ,  $\text{Hg}^+$ ,  $\text{Cd}^{2+}$ ,  $\text{Pb}^{2+}$ , glucose, glutathione, lysine, leucine, ascorbic acid, ayrosine, serine and threonine at the same concentration of  $\text{Cu}^{2+}$ , on the FL response of LMOF-2 containing 100 nM  $\text{Cu}^{2+}$  at the same time were investigated. We can find that the FL intensities are significantly quenched by 10 nM  $\text{Cu}^{2+}$ , whereas almost no additional inhibition of the FL intensities happens in the presence of others metal ion or molecules. Apparently, these results clearly indicate that the LMOF-2 FL sensing system exhibits high selectivity for  $\text{Cu}^{2+}$ .

The fluorescence intensity of LMOF-2 is sensitive to the presence of nanomolar concentrations of  $\text{Cu}^{2+}$ . To evaluate the applicability of the sensitive sensing system for  $\text{Cu}^{2+}$  ions, the dynamic range and LOD were investigated under the above-mentioned optimum experimental conditions. As shown in **Figure 4B**, the FL intensity of the LMOF-2 is quenched obviously with increasing the concentration of  $\text{Cu}^{2+}$ . There is a good response range between the quenching level,  $(F_0 - F) / F_0$ , and the concentration of  $\text{Cu}^{2+}$  in the range from 1 to 100 nM (see the inset view of Fig. 4B) with the following equation:

$$y = -0.442e^{\left(-\frac{\chi}{49.546}\right)} - 0.442e^{\left(-\frac{\chi}{49.547}\right)} + 0.878 \quad R^2=0.997$$

where  $F_0$  and  $F$  represent, respectively, the FL intensities of LMOF-2 in the absence and presence of  $\text{Cu}^{2+}$  and  $\chi$  is the concentration of  $\text{Cu}^{2+}$ . The LOD of  $\text{Cu}^{2+}$  (at the ratio of signal-to-noise = 3) was calculated to be 0.55 nM. In comparison with other reported FL methods [1-19], this sensing approach also shows higher sensitivity (1 or 2 orders of magnitude decrease in LOD) for the detection of  $\text{Cu}^{2+}$ . The highly sensing sensitivity can be attributed to the AIEgens assembled on the external surface of Nanoscale ZIF-8. This design permits that the FL probe can fully interact with the target, so as to achieve the best detection effect.

**Table S12** Various Sensing Strategies for the Detection of  $\text{Cu}^{2+}$ .

| Method          | Material             | LOD               | Real samples                 | Ref       |
|-----------------|----------------------|-------------------|------------------------------|-----------|
| Colorimetric    | PMTPS                | 3 $\mu\text{M}$   | Lake water                   | [1]       |
| Colorimetric    | CdS QDs              | 5.3 nM            | River water                  | [2]       |
| Colorimetric    | rQDs, gQDs           | 1.3 nM            | Human urine                  | [3]       |
| SERS            | Cys-AuNSs            | 10 $\mu\text{M}$  | Ionic mixture                | [4]       |
| SERS            | AuNP-AgNP            | 0.18 nM           | River water                  | [5]       |
| Electrochemical | NS4s                 | 400 nM            | Rat brain                    | [6]       |
| Electrochemical | TPAASH               | 80.3 nM           | Rat brain                    | [7]       |
| Electrochemical | ZnO/CdS              | 10 nM             | River water                  | [8]       |
| MRI             | copper-bath          | 20 $\mu\text{M}$  | /                            | [9]       |
| DNAzyme         | PLDz                 | 21.1 nM           | Ionic mixture                | [10]      |
| Click chemistry | G-quadruplex         | 5.9 nM            | Tap water                    | [11]      |
| Fluorescence    | luminol-Tb-GMP CPNPs | 4.2 nM            | River water, ascites, urine  | [12]      |
| Fluorescence    | TPM                  | 840 nM            | Human colon                  | [13]      |
| Fluorescence    | H39GFP               | 50 nM             | Human urine                  | [14]      |
| Fluorescence    | hPEI-AgNCs           | 10 nM             | River water                  | [15]      |
| Fluorescence    | GF                   | 0.6 nM            | Serum                        | [16]      |
| Fluorescence    | CDs                  | 0.3 $\mu\text{M}$ | Rat brain                    | [17]      |
| Fluorescence    | CDs@Eu-DPA MOFs      | 26.3 nM           | Drinking water               | [18]      |
| Fluorescence    | QDs/CDs@ZIF-8        | 1.53 nM           | Tap water                    | [19]      |
| Fluorescence    | LMOF-2               | 0.55 nM           | Xiangjiang river of Changsha | This work |

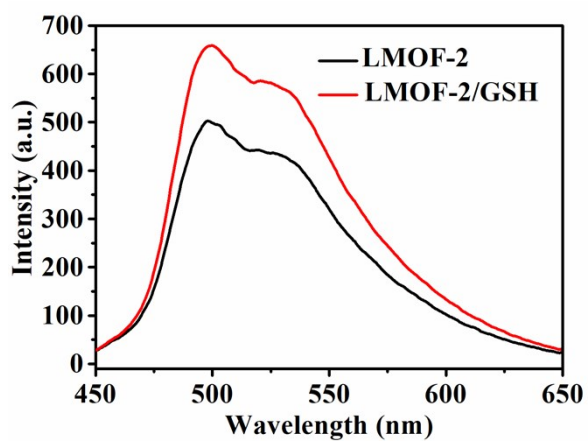

Figure S15 The FL responses of APMP-2 and LMOF-2/GSH.

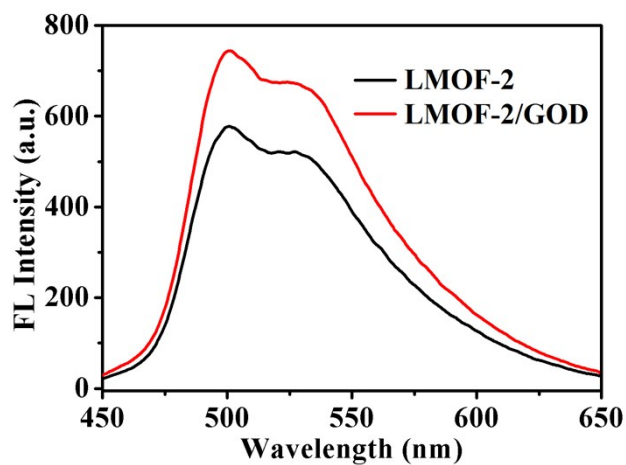

Figure S16 The FL responses of LMOF-2 and LMOF-2/GOD.

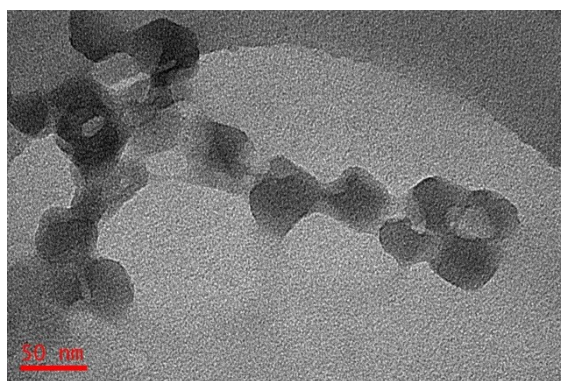

Figure S17 TEM image of LMOF-2/GOD.

## 6. CD spectra

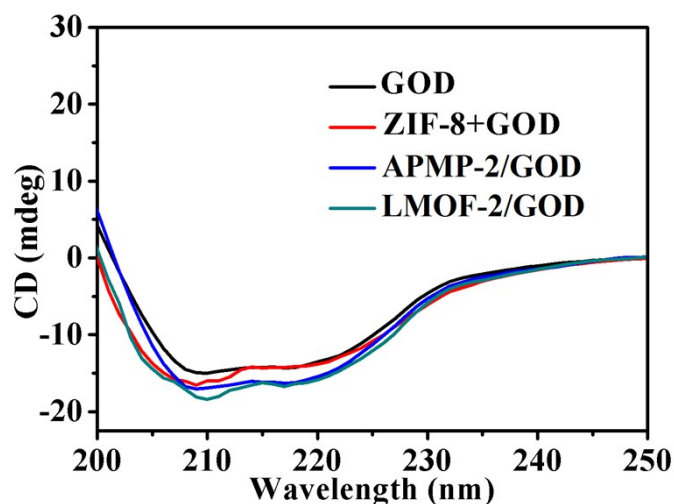

**Figure S18** CD spectra of GOD, ZIF-8/GOD, APMP-2/GOD and LMOF-2/GOD.

CD spectrometry is an effective method to investigate the structure variation of protein after interacting with nanoparticles. It can provide detail information about the percentages of different secondary structure, such  $\alpha$ -helix,  $\beta$ -sheet,  $\beta$ -turn, and random coil. To inquiry the possible influence LMOF-2 and ZIF-8 on the secondary structure of GOD, the CD spectra of GOD, APMP-2/GOD and LMOF-2/GOD system were performed. As the CD spectra shown in **Figure S18**, GOD exhibits two negative absorption peaks at 208 and 222 nm which are the characteristic absorption peaks of the  $\alpha$ -helix structure of proteins. After the addition of APMP-2, the absorbances of two negative bands at 208 and 222 nm all increase significantly, indicating the secondary structure of GOD is varied, especially for the  $\alpha$ -helix structure. In addition, there is nearly no change between the CD spectra of APMP-2/GOD and LMOF-2/GOD, indicating that ZIF-8 had slightly effect on the secondary structure of GOD. In order to accurately quantify the  $\alpha$ -helical structure of GOD, the results are expressed in mean residue ellipticity (MRE) ( $\text{deg cm}^2 \text{dmol}^{-1}$ ) by the following equation:

$$MRE = \frac{\theta_{obs}}{10nlC_p}$$

Herein,  $\theta_{obs}$  represents the measured ellipticity,  $n$  is the total number of amino acids of GOD (587),  $l$  is the path length (0.1 cm), and  $C_p$  is the concentration of GOD, respectively. Therefore, the content of the  $\alpha$ -helix structure of GOD can be calculated through the following equation:

$$\alpha - helix = \left[ \frac{-MRE_{208 \text{ nm}} - 4000}{33000 - 4000} \right] \times 100\%$$

The results of the analysis are shown in Table S12. It can be seen that the percentage of protein secondary structure of APMP-2/GOD and LMOF-2/GOD is substantially unchanged, further indicating that ZIF-8 has less influence on the secondary structure of GOD. In addition, an obvious increasing tendencies of the  $\alpha$ -helix and  $\beta$ -sheet contents and decreasing tendencies of other secondary structure contents were obtained at the present of APMP-2 or APMP-2/ZIF-8, this indicates that the hydrogen bond network of the GOD becomes stronger after interaction with APMP-2, which may attribute to the formation of non-covalent bonds between the APMP-2 and the peptide bond of the GOD.

**Table S13** The percentage of protein secondary structure of pure GOD, APMP-2/GOD and LMOF-2/GOD.

|            | $\alpha$ -Helix (%) | $\beta$ -sheet (%) | $\beta$ -Turn (%) | Random coil (%) |
|------------|---------------------|--------------------|-------------------|-----------------|
| GOD        | 17.4                | 15.1               | 20.7              | 46.8            |
| APMP-2/GOD | 18.3                | 15.6               | 20.4              | 45.7            |
| LMOF-2/GOD | 18.3                | 16.1               | 20.4              | 45.2            |

## 7. GOD relative activity assay

The GOD activity was determined by coupling oxidation of glucose producing  $H_2O_2$ , which was further used to oxidize TMB in the presence of HRP. In a typical reaction, TMB (72  $\mu$ L, 1 mg/mL), glucose (20  $\mu$ L, 10 mM), HRP (5  $\mu$ L, 100  $\mu$ g/mL), GOD (5  $\mu$ L, 100  $\mu$ g/mL) were mixed, and the appropriate amount of PBS buffer (pH=6.5, 100 mM) was added to make up the volume to 500  $\mu$ L. The mixture was then allowed to stand for 30 min. The absorbance was measured at 650 nm. For optimization of the HRP/GOD ratio, different ratios from 6:1 to 1:6 were used, and the abovementioned procedure was followed.

The relative activity of bio-catalysts was calculated from the formula <sup>[20, 21]</sup>

$$R = \frac{A_{IE}}{A_0} \times 100\%$$

where  $A_{IE}$  is the activity of immobilized GOD and  $A_0$  is the activity of native GOD.

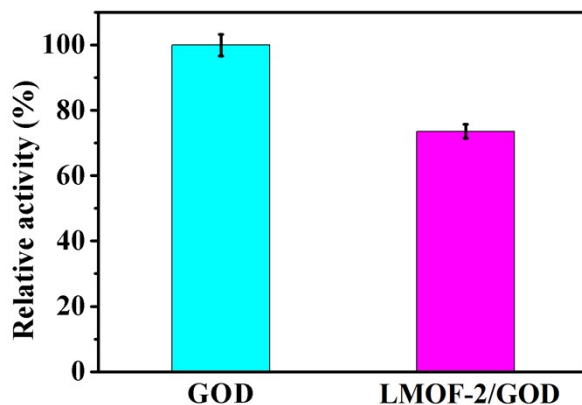

Figure S19 Relative enzymatic activity of GOD in LMOF-2/GOD.

### 8. Cascade reaction of enzyme catalyzed oxidation and redox ring-closure reaction

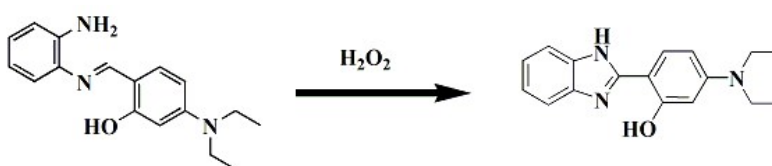

Figure S20 The redox ring-closure reaction of APMP-2 to generate the blue-shifted product 2-(1H-Benzoimidazol-2-yl)-5-diethylamino-phenol (Compound 13)

**Compound 13:**  $^1\text{H NMR}$  (DMSO- $d_6$ , 400 MHz)  $\delta$  1.13 (t,  $J = 6.0$  Hz, 6H), 3.38 (m,  $J = 6.0$  Hz, 4H), 6.20 (s, 1H), 6.37 (d,  $J = 3.0$  Hz, 1H), 7.20 (t,  $J = 3.0$  Hz, 2H), 7.55 (s, 2H), 7.79 (d,  $J = 9.0$  Hz, 1H), 12.85 (s, 2H). HRMSEI(+) calcd for  $\text{C}_{17}\text{H}_{19}\text{N}_3\text{O}^+ [\text{M}+1]^+$  282.1601, found 282.1593;

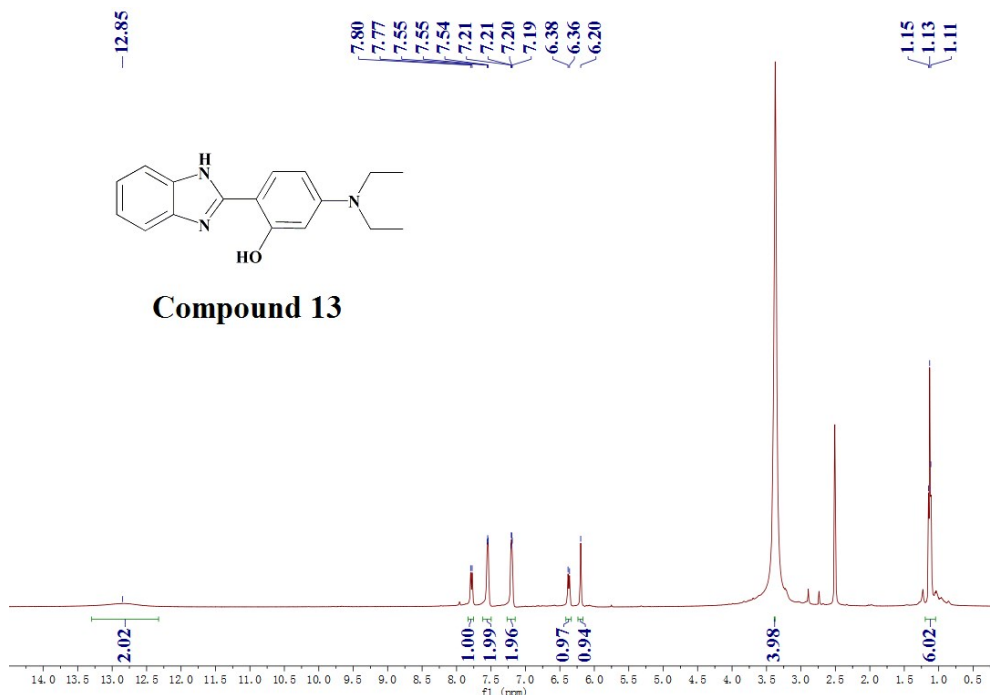

Figure S21  $^1\text{H NMR}$  spectrum of 2-(1H-Benzoimidazol-2-yl)-5-diethylamino-phenol in DMSO- $d_6$ .

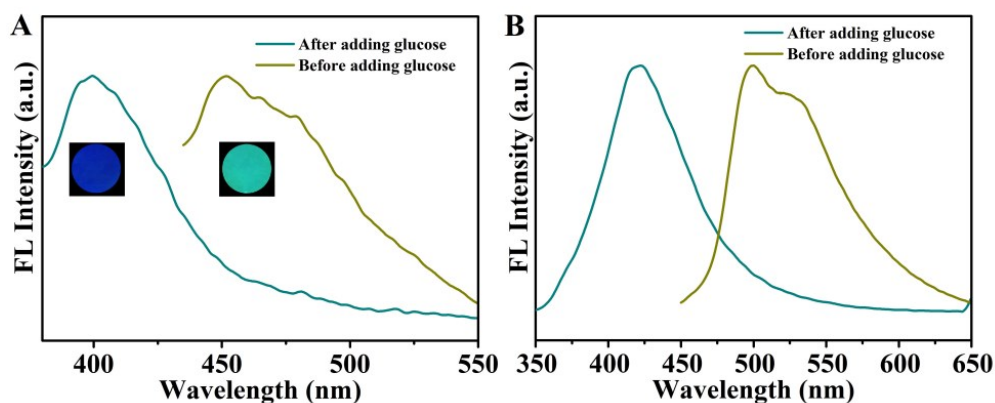

**Figure S22** Fluorescence spectra of filter paper loaded with LMOFs/GOD (A) and LMOFs/GOD solution (B) before and after (ex: 333 nm em: 399 nm) being treated by glucose.

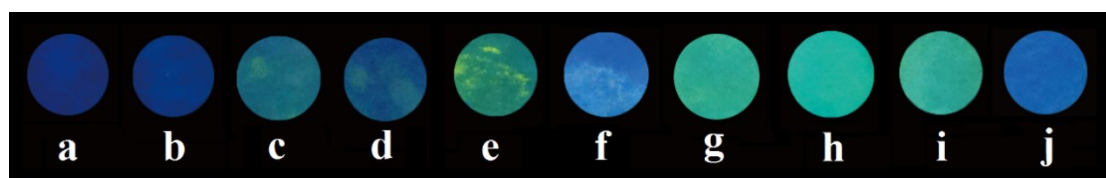

**Figure S23** a) The untreated filter paper immersed in aqueous solution for 30 min. b) The untreated filter paper immersed in 10 mM glucose solution for 30 min. c) The filter paper loaded with APMP-2 and immersed in aqueous solution for 30 min. d) The filter paper loaded with APMP-2 and immersed in 10 mM glucose solution for 30 min. e) The filter paper loaded with APMP-2/GOD and immersed in aqueous solution for 30 min. f) The filter paper loaded with APMP-2/GOD and immersed in 10 mM glucose solution for 30 min. g) The filter paper loaded with LMOF-2 and immersed in aqueous solution for 30 min. h) The filter paper loaded with LMOF-2 and immersed in 10 mM glucose solution for 30 min. i) The filter paper loaded with LMOF-2/GOD and immersed in aqueous solution for 30 min. j) The filter paper loaded with LMOF-2/GOD and immersed in 10 mM glucose solution for 30 min.

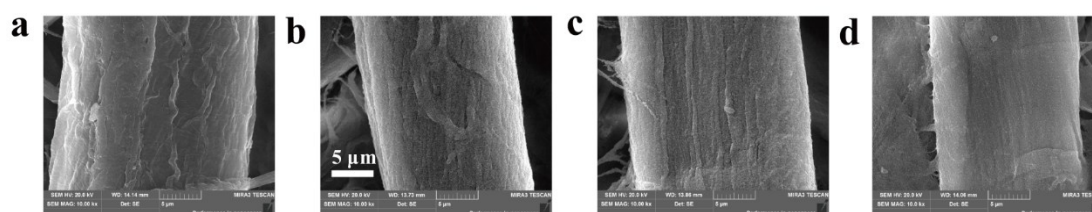

**Figure S24** SEM images of the filter paper without any treatment (a) and filter paper loaded with ZIF-8 (b), APMP-2/ZIF-8 (c) and LMOF-2/GOD (d), respectively.



## References

- [1] Z. Yao, Y. Yang, X. Chen, X. Hu, L. Zhang, L. Liu, Y. Zhao, H. C. Wu, *Anal. Chem.*, 2013, **85**, 5650-5653.
- [2] S. Tang, M. Wang, Z. Li, P. Tong, Q. Chen, G. Li, J. Chen, L. Zhang, *Biosens. Bioelectron.*, 2017, **89**, 866-870.
- [3] Y. Cai, J. You, Z. You, F. Dong, S. Du, L. Zhang, *Biosens. Bioelectron.*, 2018, **99**, 332-337.
- [4] P. Ndokoye, J. Ke, J. Liu, Q. Zhao, X. Li, *Langmuir*, 2014, **30**, 13491-13497.
- [5] Y. Wang, Z. Su, L. Wang, J. Dong, J. Xue, J. Yu, Y. Wang, X. Hua, M. Wang, C. Zhang, F. Liu, *Anal. Chem.*, 2017, **89**, 6392-6398.
- [6] W. Liu, H. Dong, L. Zhang, Y. Tian, *Angew. Chem. Int. Edit.*, 2017, **56**, 16328-16332.
- [7] L. Zhang, Y. Han, F. Zhao, G. Shi, Y. Tian, *Anal. Chem.*, 2015, **87**, 2931-2936.
- [8] Q. Shen, X. Zhao, S. Zhou, W. Hou, J.-J. Zhu, *J. Phys. Chem. C*, 2011, **115**, 17958-17964.
- [9] J. M. Bray, A. J. Davenport, K. S. Ryder, M. M. Britton, *Angew. Chem. Int. Edit.*, 2016, **55**, 9394-9397.
- [10] S. Wang, C. Liu, G. Li, Y. Sheng, Y. Sun, H. Rui, J. Zhang, J. Xu, D. Jiang, *ACS Sensors* 2017, **2**, 364-370.
- [11] C. Ge, Q. Luo, D. Wang, S. Zhao, X. Liang, L. Yu, X. Xing, L. Zeng, *Anal. Chem.*, 2014, **86**, 6387-6392.
- [12] Y.-J. Tong, L.-D. Yu, L.-L. Wu, S.-P. Cao, Y.-L. Guo, R.-P. Liang, J.-D. Qiu, *ACS Sustain. Chem. Eng.*, 2018, **6**, 9333-9341.
- [13] D. E. Kang, C. S. Lim, J. Y. Kim, E. S. Kim, H. J. Chun, B. R. Cho, *Anal. Chem.*, 2014, **86**, 5353-5359.
- [14] C. Lei, Z. Wang, Z. Nie, H. Deng, H. Hu, Y. Huang, S. Yao, *Anal. Chem.*, 2015, **87**, 1974-1980.
- [15] Z. Yuan, N. Cai, Y. Du, Y. He, E. S. Yeung, *Anal. Chem.*, 2014, **86**, 419-426.
- [16] X. Fang, Y. Liu, L. Jimenez, Y. Duan, G. B. Adkins, L. Qiao, B. Liu, W. Zhong, *Anal. Chem.*, 2017, **89**, 11758-11764.
- [17] Y. Lin, C. Wang, L. Li, H. Wang, K. Liu, K. Wang, B. Li, *ACS Appl. Mater. Inter.*, 2015, **7**, 27262-27270.
- [18] J. Hao, F. Liu, N. Liu, M. Zeng, Y. Song, L. Wang, *Sens. Actuators, B*, 2017, **245**, 641-647.

- [19] Y. Ma, G. Xu, F. Wei, Y. Cen, Y. Ma, Y. Song, X. Xu, M. Shi, S. Muhammad, Q. Hu, *J. Mater. Chem. C*, 2017, **5**, 8566-8571.
- [20] aB. Zhao, L. Zhou, L. Ma, Y. He, J. Gao, D. Li, Y. Jiang, *Int. J. Biol. Macromol.*, 2018, **107**, 2034-2043.
- [21] bP. Wu, Y. He, H.-F. Wang, X.-P. Yan, *Anal. Chem.*, 2010, **82**, 1427-1433.
